# Supplementary material for: Carotid Intima-Media Thickness: Novel Loci, Sex-Specific Effects, and Genetic Correlations With Obesity and Glucometabolic Traits in UK Biobank
Source: PubMed Central journal article supplement (PMC6975521; doi:10.1161/atvbaha.119.313226), 2019-12-05
Supplement: atv-40-446-s001.pdf [file atv-40-446-s001.pdf]

## SUPPLEMENTAL MATERIALS

### **Carotid intima-media thickness: novel loci, sex-specific effects and genetic correlations with obesity and glucometabolic traits in UK Biobank**

Rona J. Strawbridge PhD<sup>1,2,3</sup>, Joey Ward MSc<sup>1</sup>, Mark E.S. Bailey PhD<sup>3</sup>, Breda Cullen PhD<sup>1</sup>, Amy Ferguson PhD<sup>1</sup>, Nicholas Graham MBChB<sup>1</sup>, Keira J.A. Johnston MSc<sup>1,3,4</sup>, Laura M. Lyall PhD<sup>1</sup>, Robert Pearsall DPhil<sup>1</sup>, Jill Pell MD<sup>1</sup>, Richard J Shaw PhD<sup>1</sup>, Rachana Tank MSc<sup>1</sup>, Donald M. Lyall PhD<sup>1</sup> and Daniel J. Smith MD<sup>1</sup>

<sup>1</sup>Institute of Health and Wellbeing, University of Glasgow, Glasgow, UK.

<sup>2</sup>Health Data Research UK

<sup>3</sup>Cardiovascular Medicine Unit, Department of Medicine Solna, Karolinska Institutet, Stockholm, Sweden

<sup>3</sup>School of Life Sciences, College of Medical, Veterinary and Life Sciences, University of Glasgow, Glasgow, UK

<sup>4</sup>Division of Psychiatry, College of Medicine, University of Edinburgh, Edinburgh, UK

\* Corresponding author:

Dr Rona J. Strawbridge ([rona.strawbridge@glasgow.ac.uk](mailto:rona.strawbridge@glasgow.ac.uk), +44 (0)141 330 3842)

1 Lilybank Gardens, Glasgow, G12 8RZ, UK

**Supplemental Figure I:** Plot of first two principle genetic components (PGCs), demonstrating the homogeneity of the white British participants in the UK Biobank IMT sample.

**Supplemental Figure II:** LD between SNPs with suggestive evidence of association in two loci on Chr5. Highlighted SNPs are A) Lead SNP for GW-significant locus for IMTmean on Chr5 (rs758080886), B) previously reported lead SNP (rs22490) and C)

lead SNP for the women-only locus for IMTmean (rs309563). Inset, zoomed in LD plot of only these three SNPs.

**Supplemental Figure III:** Forest plot showing the effect sizes of published cIMT-associated SNPs in UK Biobank.

**Supplemental Figure IV:** Forest plot showing the effect sizes of novel cIMT-associated SNPs in UK Biobank.

**Supplemental Table I:** Comparison of GWAS significant SNPs for IMTmean on IMTmax

**Supplemental Table II:** Effects of previously reported IMT loci in the UKB GWAS

**Supplemental Table III:** Effects of GWAS-significant loci reported here in the CHARGE meta-analysis of IMT.

**Supplemental Table IV:** Comparison of GWAS significant SNPs for IMTmean in men and women

**Supplemental Table V:** Genetic correlations with IMTmean by sex

**Supplemental Table VI:** Previous associations with SNPs in GWAS-significant loci

**Supplemental Table VII:** Predicted functional, coding or loss of function variants

**Supplemental Table VIII:** EQTLs identified in GTEx

**Supplemental Table IX:** Baseline demographic characteristics of the individuals included in the analysis of ISH

**Supplemental Table X:** Baseline demographic characteristics of the individuals included in the analysis of stroke

**Supplemental Table XI:** Effect of IMT SNPs on ISH or stroke in UKB

## Major Resources Table

### Data & Code Availability

| Description                            | Source / Repository    | Persistent ID / URL                                                     |
|----------------------------------------|------------------------|-------------------------------------------------------------------------|
| UK Biobank genetic and phenotypic data | UK Biobank             | <a href="https://www.ukbiobank.ac.uk/">https://www.ukbiobank.ac.uk/</a> |
| Analysis Code                          | Available upon request | NA                                                                      |

Supplemental Figure I

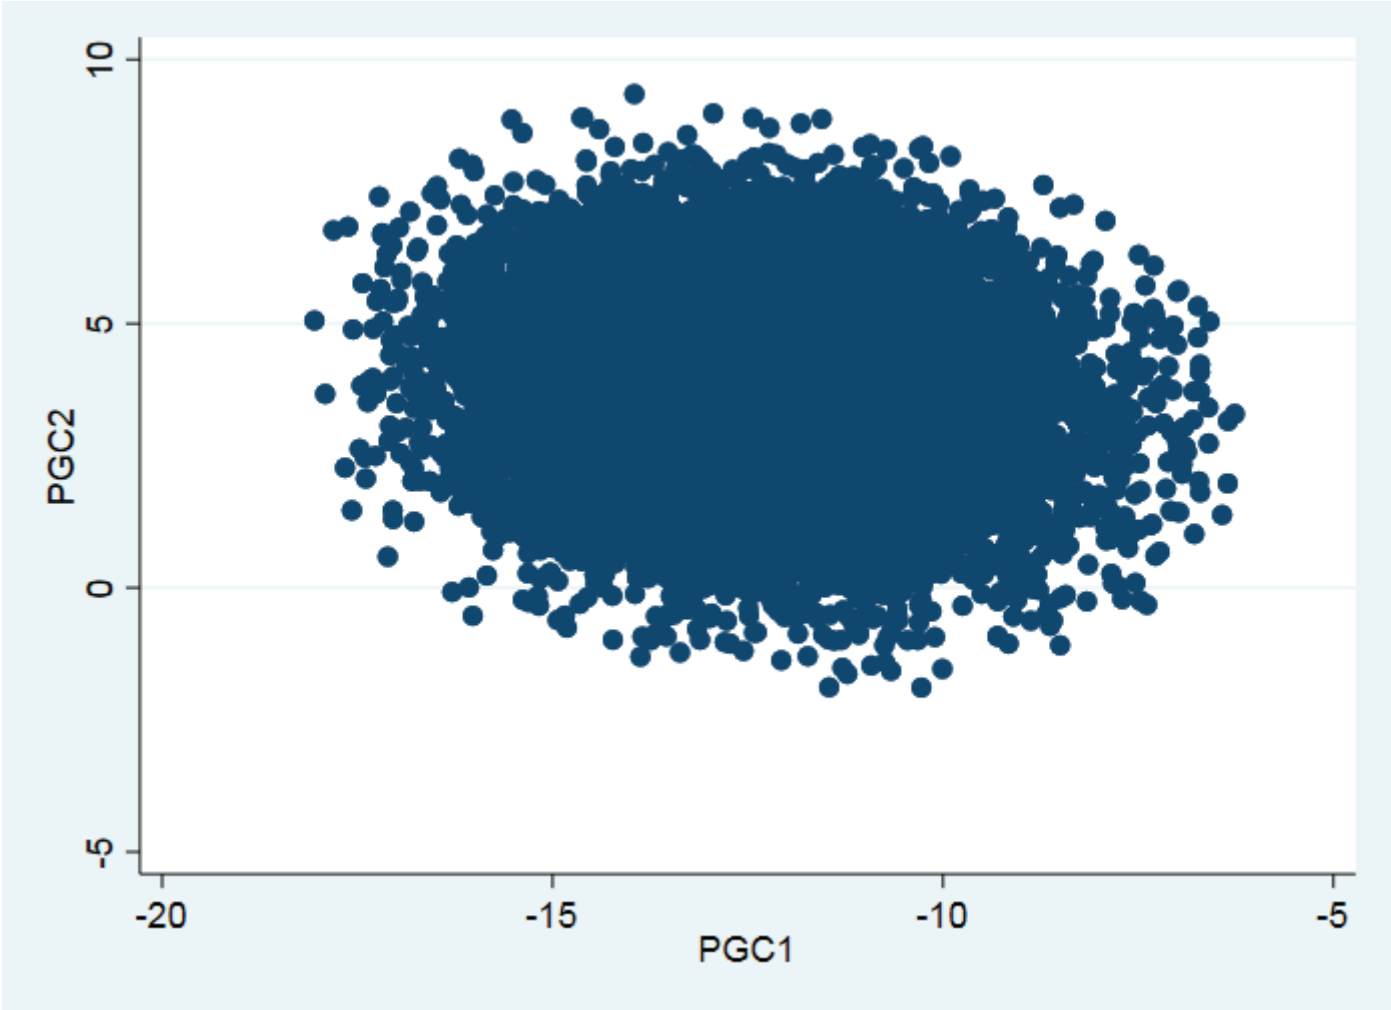

# Supplemental Figure II

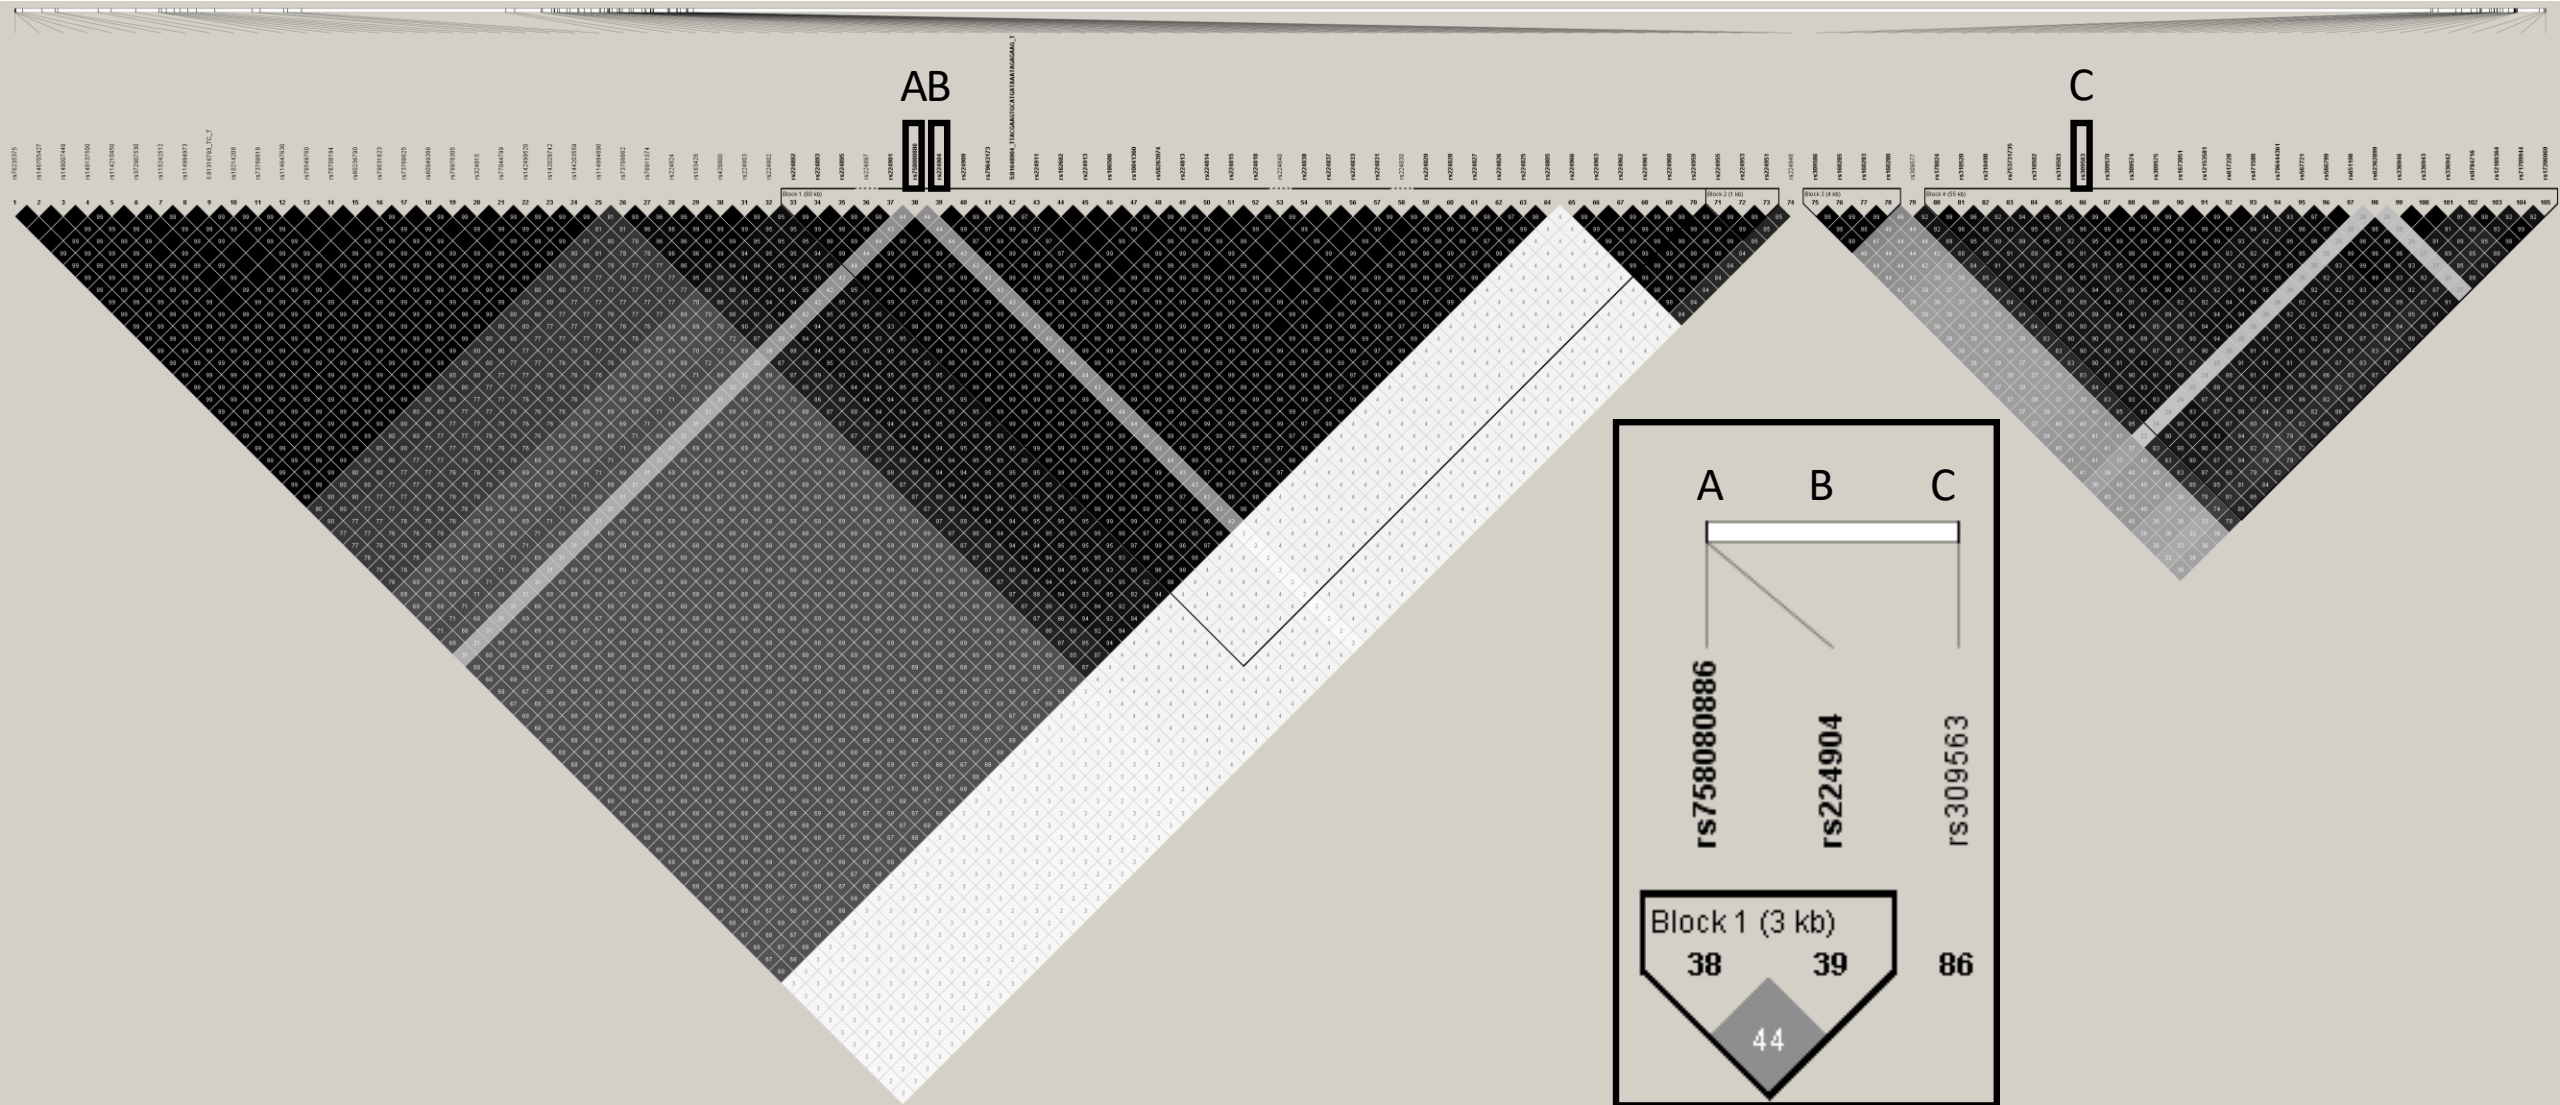

Supplemental Figure III

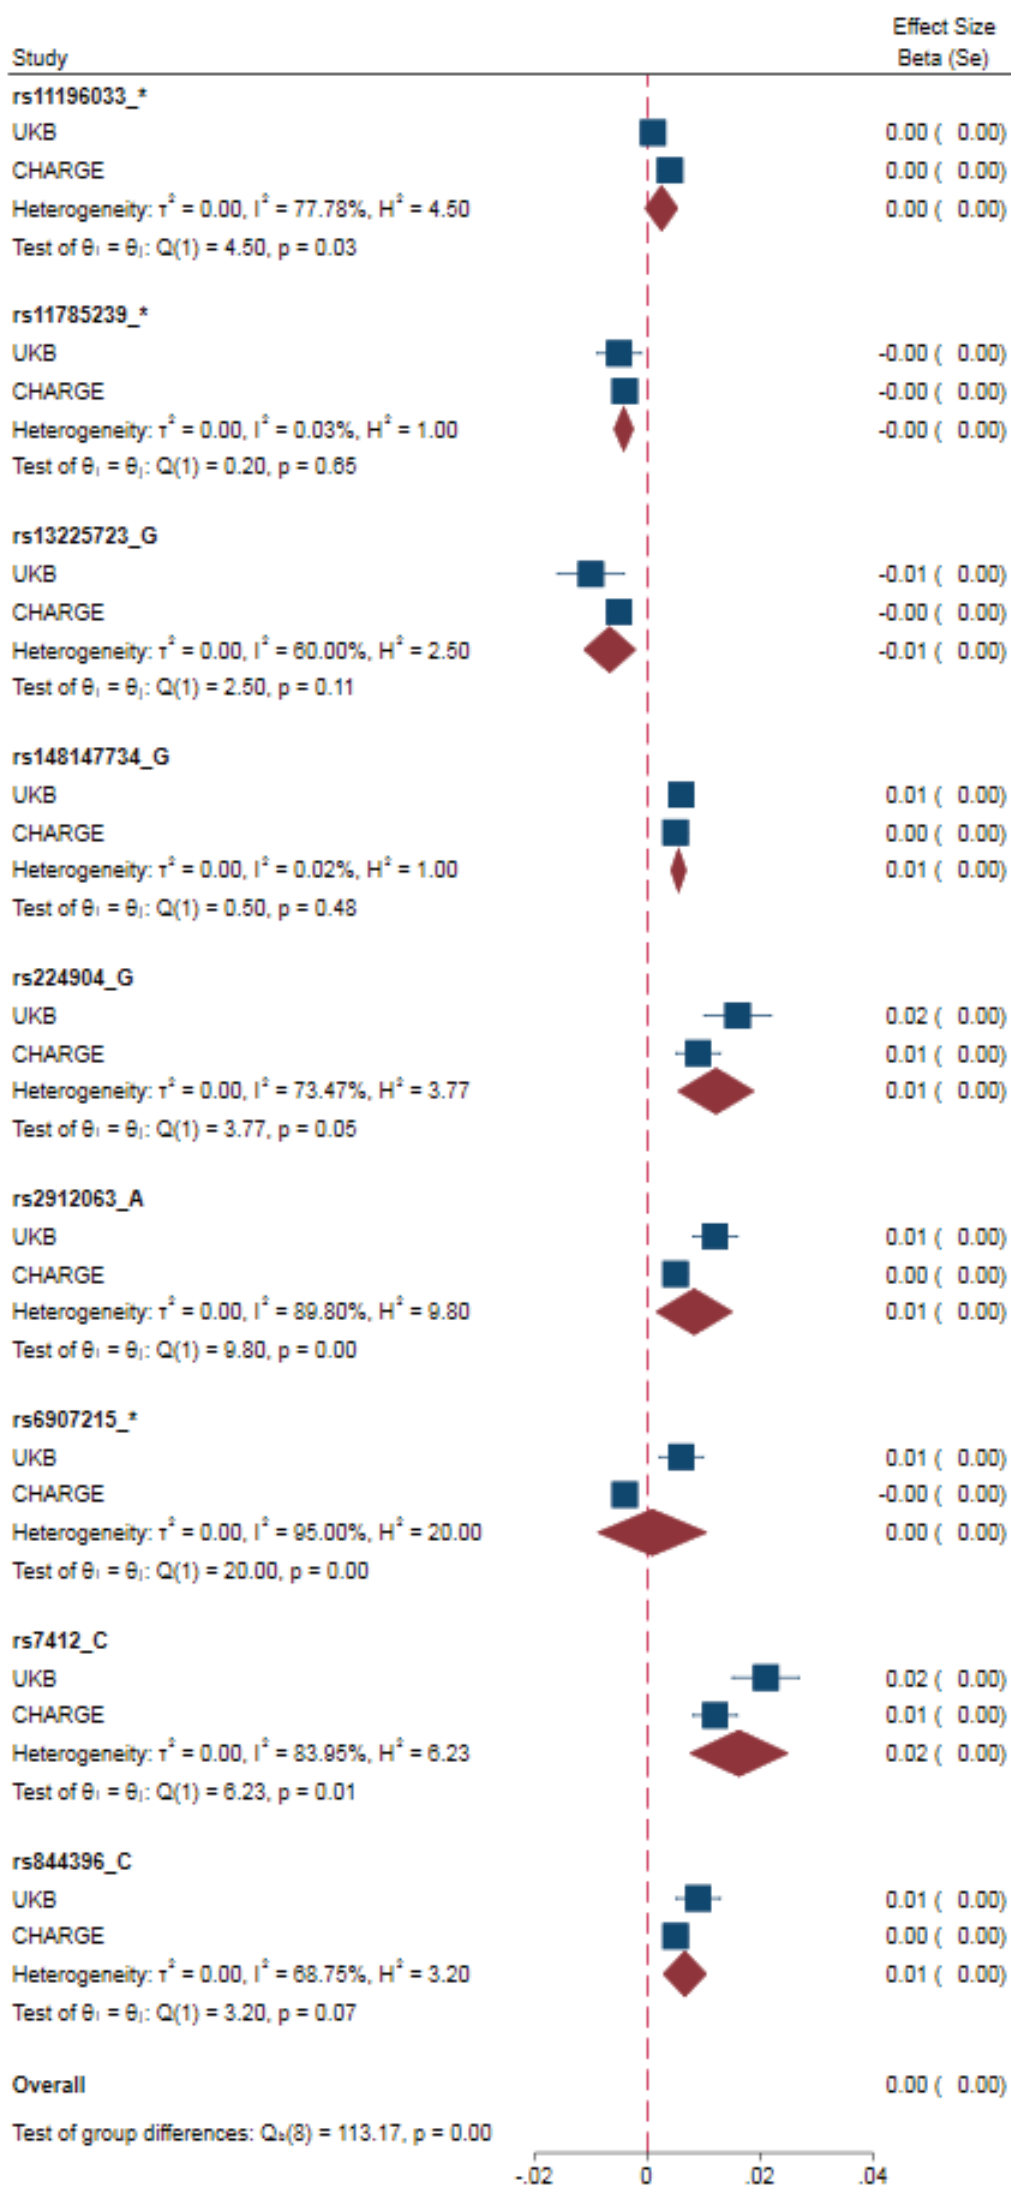

Supplemental Figure IV

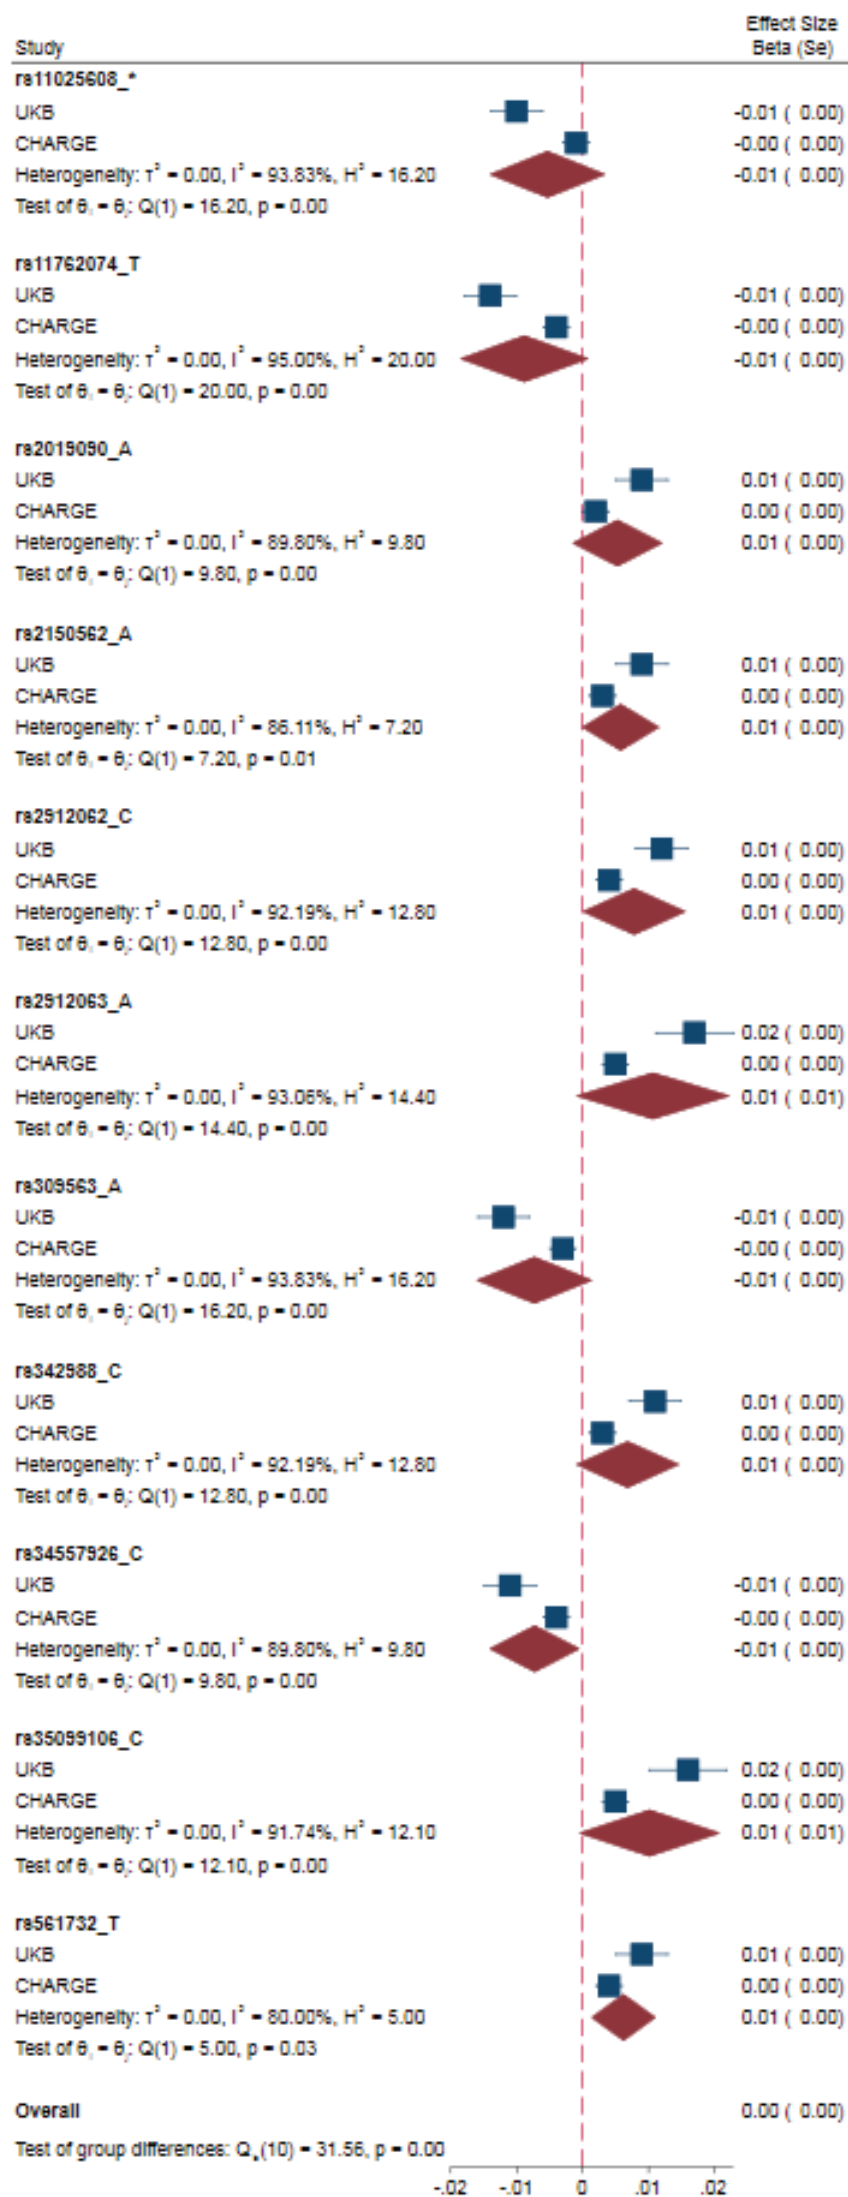

Supplementary Table I: Comparison of GWAS significant SNPs for IMTmean on IMTmax

| CHR | BP       | SNP             | A1 | A0    | A1freq | IMTmean |       |                 | IMTmax |       |                 | IMTmeanmax |       |                 |
|-----|----------|-----------------|----|-------|--------|---------|-------|-----------------|--------|-------|-----------------|------------|-------|-----------------|
|     |          |                 |    |       |        | Beta    | se    | P               | Beta   | se    | P               | Beta       | se    | P               |
| 5   | 81616381 | rs420800        | G  | A     | 0.95   | -0.017  | 0.003 | <b>4.30E-08</b> | -0.018 | 0.004 | 9.20E-06        | -0.017     | 0.003 | 3.80E-07        |
| 5   | 81618075 | rs224803        | C  | T     | 0.95   | -0.017  | 0.003 | <b>4.80E-08</b> | -0.018 | 0.004 | 1.00E-05        | -0.017     | 0.003 | 4.40E-07        |
| 5   | 81634499 | rs758080886     | CA | C     | 0.15   | 0.013   | 0.002 | <b>3.10E-08</b> | 0.015  | 0.003 | 2.10E-07        | 0.011      | 0.002 | 1.60E-06        |
| 5   | 81683739 | rs224805        | A  | G     | 0.05   | 0.017   | 0.003 | <b>4.10E-08</b> | 0.017  | 0.004 | 2.50E-05        | 0.016      | 0.003 | 8.60E-07        |
| 5   | 81699253 | rs224960        | A  | G     | 0.52   | 0.008   | 0.001 | <b>4.90E-08</b> | 0.008  | 0.002 | 8.00E-06        | 0.007      | 0.001 | 4.40E-07        |
| 7   | 35423859 | rs2541899       | C  | T     | 0.24   | 0.009   | 0.002 | <b>2.20E-08</b> | 0.009  | 0.002 | 1.70E-05        | 0.009      | 0.002 | 8.30E-08        |
| 7   | 35428513 | rs12155459      | A  | T     | 0.77   | -0.011  | 0.002 | <b>2.40E-10</b> | -0.013 | 0.002 | <b>2.80E-09</b> | -0.012     | 0.002 | <b>3.20E-11</b> |
| 7   | 35429465 | rs11766731      | G  | T     | 0.77   | -0.011  | 0.002 | <b>1.60E-10</b> | -0.013 | 0.002 | <b>1.90E-09</b> | -0.012     | 0.002 | <b>2.20E-11</b> |
| 7   | 35435835 | rs2541905       | T  | C     | 0.23   | 0.011   | 0.002 | <b>4.60E-10</b> | 0.013  | 0.002 | <b>2.50E-09</b> | 0.011      | 0.002 | <b>5.00E-11</b> |
| 7   | 35436932 | rs70981917      | C  | CT    | 0.43   | 0.008   | 0.001 | <b>9.70E-09</b> | 0.009  | 0.002 | <b>2.70E-06</b> | 0.008      | 0.001 | <b>1.80E-08</b> |
| 7   | 35438779 | rs2013385       | A  | G     | 0.32   | 0.009   | 0.002 | <b>5.10E-10</b> | 0.011  | 0.002 | <b>2.00E-08</b> | 0.010      | 0.002 | <b>3.30E-10</b> |
| 7   | 35438831 | rs741408        | T  | C     | 0.23   | 0.011   | 0.002 | <b>3.80E-11</b> | 0.013  | 0.002 | <b>7.50E-10</b> | 0.012      | 0.002 | <b>6.30E-12</b> |
| 7   | 35440055 | rs2592856       | C  | T     | 0.23   | 0.011   | 0.002 | <b>2.60E-11</b> | 0.013  | 0.002 | <b>5.50E-10</b> | 0.012      | 0.002 | <b>3.70E-12</b> |
| 7   | 35440155 | rs11762074      | T  | C     | 0.77   | -0.011  | 0.002 | <b>1.80E-11</b> | -0.014 | 0.002 | <b>4.30E-10</b> | -0.012     | 0.002 | <b>2.70E-12</b> |
| 7   | 35446189 | rs2592855       | T  | C     | 0.23   | 0.011   | 0.002 | <b>2.40E-11</b> | 0.013  | 0.002 | <b>5.20E-10</b> | 0.012      | 0.002 | <b>4.30E-12</b> |
| 7   | 35448018 | rs2250212       | A  | G     | 0.32   | 0.010   | 0.002 | <b>3.10E-10</b> | 0.011  | 0.002 | <b>1.20E-08</b> | 0.010      | 0.002 | <b>2.00E-10</b> |
| 7   | 35449334 | rs998652        | A  | G     | 0.23   | 0.011   | 0.002 | <b>2.60E-11</b> | 0.013  | 0.002 | <b>5.70E-10</b> | 0.012      | 0.002 | <b>4.80E-12</b> |
| 7   | 35451830 | rs17765314      | G  | A     | 0.77   | -0.011  | 0.002 | <b>2.50E-11</b> | -0.013 | 0.002 | <b>5.70E-10</b> | -0.012     | 0.002 | <b>4.70E-12</b> |
| 7   | 35451910 | rs2592851       | T  | C     | 0.23   | 0.011   | 0.002 | <b>2.50E-11</b> | 0.013  | 0.002 | <b>5.60E-10</b> | 0.012      | 0.002 | <b>4.50E-12</b> |
| 7   | 35452092 | rs1362655       | G  | A     | 0.23   | 0.011   | 0.002 | <b>2.60E-11</b> | 0.013  | 0.002 | <b>5.90E-10</b> | 0.012      | 0.002 | <b>4.90E-12</b> |
| 7   | 35455088 | rs2592850       | T  | A     | 0.32   | 0.010   | 0.002 | <b>2.80E-10</b> | 0.011  | 0.002 | <b>1.30E-08</b> | 0.010      | 0.002 | <b>2.10E-10</b> |
| 7   | 35456691 | rs2592849       | A  | T     | 0.32   | 0.010   | 0.002 | <b>3.20E-10</b> | 0.011  | 0.002 | <b>1.40E-08</b> | 0.010      | 0.002 | <b>2.10E-10</b> |
| 7   | 35457954 | 7:35457954_AT_A | AT | A     | 0.32   | 0.009   | 0.002 | <b>5.50E-10</b> | 0.012  | 0.002 | <b>3.90E-09</b> | 0.010      | 0.002 | <b>1.70E-10</b> |
| 7   | 35458137 | rs140476889     | A  | AAAAC | 0.32   | 0.010   | 0.002 | <b>2.90E-10</b> | 0.011  | 0.002 | <b>1.20E-08</b> | 0.010      | 0.002 | <b>1.90E-10</b> |
| 7   | 35458551 | rs200832044     | GT | G     | 0.32   | 0.009   | 0.002 | <b>9.00E-10</b> | 0.011  | 0.002 | <b>3.20E-08</b> | 0.010      | 0.002 | <b>5.70E-10</b> |
| 7   | 35458934 | rs342976        | T  | C     | 0.32   | 0.009   | 0.002 | <b>4.40E-10</b> | 0.011  | 0.002 | <b>1.90E-08</b> | 0.010      | 0.002 | <b>2.80E-10</b> |



|   |          |                  |     |    |      |        |       |                 |        |       |                 |        |       |                 |
|---|----------|------------------|-----|----|------|--------|-------|-----------------|--------|-------|-----------------|--------|-------|-----------------|
| 7 | 35459888 | rs342977         | G   | A  | 0.23 | 0.011  | 0.002 | <b>4.40E-11</b> | 0.013  | 0.002 | <b>1.10E-09</b> | 0.012  | 0.002 | <b>6.70E-12</b> |
| 7 | 35460547 | rs342979         | C   | T  | 0.32 | 0.009  | 0.002 | <b>3.90E-10</b> | 0.011  | 0.002 | <b>1.60E-08</b> | 0.010  | 0.002 | <b>2.60E-10</b> |
| 7 | 35461538 | rs342981         | G   | A  | 0.32 | 0.010  | 0.002 | <b>3.30E-10</b> | 0.011  | 0.002 | <b>1.60E-08</b> | 0.010  | 0.002 | <b>2.10E-10</b> |
| 7 | 35461715 | rs2551797        | T   | C  | 0.32 | 0.010  | 0.002 | <b>3.30E-10</b> | 0.011  | 0.002 | <b>1.60E-08</b> | 0.010  | 0.002 | <b>2.10E-10</b> |
| 7 | 35462145 | rs342982         | G   | T  | 0.32 | 0.010  | 0.002 | <b>3.20E-10</b> | 0.011  | 0.002 | <b>1.60E-08</b> | 0.010  | 0.002 | <b>2.00E-10</b> |
| 7 | 35464620 | rs34502079       | A   | AT | 0.33 | 0.010  | 0.002 | <b>8.30E-11</b> | 0.012  | 0.002 | <b>3.00E-09</b> | 0.010  | 0.002 | <b>2.50E-11</b> |
| 7 | 35464784 | rs342983         | T   | G  | 0.27 | 0.010  | 0.002 | <b>1.70E-10</b> | 0.012  | 0.002 | <b>3.20E-08</b> | 0.011  | 0.002 | <b>7.70E-11</b> |
| 7 | 35466464 | rs342986         | G   | A  | 0.23 | 0.011  | 0.002 | <b>3.90E-11</b> | 0.013  | 0.002 | <b>1.00E-09</b> | 0.012  | 0.002 | <b>5.00E-12</b> |
| 7 | 35466658 | rs35361607       | A   | AC | 0.37 | 0.008  | 0.001 | <b>2.80E-08</b> | 0.009  | 0.002 | 1.80E-06        | 0.008  | 0.001 | <b>1.70E-08</b> |
| 7 | 35466755 | rs342987         | T   | G  | 0.23 | 0.011  | 0.002 | <b>3.70E-11</b> | 0.013  | 0.002 | <b>1.00E-09</b> | 0.012  | 0.002 | <b>4.80E-12</b> |
| 7 | 35467026 | rs342988         | C   | T  | 0.28 | 0.011  | 0.002 | <b>8.90E-12</b> | 0.013  | 0.002 | <b>8.80E-10</b> | 0.011  | 0.002 | <b>1.30E-12</b> |
| 7 | 35467677 | 7:35467677_TAA_T | TAA | T  | 0.24 | 0.011  | 0.002 | <b>3.80E-11</b> | 0.013  | 0.002 | <b>1.00E-09</b> | 0.012  | 0.002 | <b>2.80E-12</b> |
| 7 | 35467896 | rs342989         | A   | G  | 0.23 | 0.011  | 0.002 | <b>3.60E-11</b> | 0.013  | 0.002 | <b>9.80E-10</b> | 0.012  | 0.002 | <b>5.50E-12</b> |
| 7 | 35468763 | rs17697812       | T   | C  | 0.77 | -0.011 | 0.002 | <b>4.90E-11</b> | -0.013 | 0.002 | <b>1.20E-09</b> | -0.012 | 0.002 | <b>6.90E-12</b> |
| 7 | 35469045 | rs342990         | G   | T  | 0.38 | 0.008  | 0.001 | <b>2.80E-08</b> | 0.009  | 0.002 | 8.50E-07        | 0.009  | 0.002 | <b>9.30E-09</b> |
| 7 | 35469691 | rs342991         | G   | T  | 0.32 | 0.009  | 0.002 | <b>8.20E-10</b> | 0.011  | 0.002 | <b>2.60E-08</b> | 0.010  | 0.002 | <b>4.40E-10</b> |
| 7 | 35469835 | rs342992         | C   | T  | 0.23 | 0.011  | 0.002 | <b>4.90E-11</b> | 0.013  | 0.002 | <b>1.20E-09</b> | 0.012  | 0.002 | <b>6.10E-12</b> |
| 7 | 35469898 | rs342993         | G   | A  | 0.32 | 0.009  | 0.002 | <b>7.20E-10</b> | 0.011  | 0.002 | <b>2.50E-08</b> | 0.010  | 0.002 | <b>4.00E-10</b> |
| 7 | 35471979 | rs342996         | G   | C  | 0.33 | 0.009  | 0.002 | <b>6.00E-10</b> | 0.011  | 0.002 | <b>2.10E-08</b> | 0.010  | 0.002 | <b>2.60E-10</b> |
| 7 | 35474622 | rs342997         | T   | C  | 0.32 | 0.009  | 0.002 | <b>7.20E-10</b> | 0.011  | 0.002 | <b>2.60E-08</b> | 0.010  | 0.002 | <b>4.10E-10</b> |
| 7 | 35475980 | rs342998         | T   | C  | 0.32 | 0.009  | 0.002 | <b>7.20E-10</b> | 0.011  | 0.002 | <b>2.60E-08</b> | 0.010  | 0.002 | <b>3.60E-10</b> |
| 7 | 35477175 | rs343000         | C   | T  | 0.23 | 0.011  | 0.002 | <b>5.60E-11</b> | 0.013  | 0.002 | <b>1.50E-09</b> | 0.012  | 0.002 | <b>7.30E-12</b> |
| 7 | 35478327 | rs343001         | C   | G  | 0.32 | 0.009  | 0.002 | <b>7.30E-10</b> | 0.011  | 0.002 | <b>2.60E-08</b> | 0.010  | 0.002 | <b>3.60E-10</b> |
| 7 | 35478515 | rs343002         | T   | C  | 0.23 | 0.011  | 0.002 | <b>5.60E-11</b> | 0.013  | 0.002 | <b>1.50E-09</b> | 0.012  | 0.002 | <b>7.20E-12</b> |
| 7 | 35479439 | rs343003         | C   | T  | 0.23 | 0.011  | 0.002 | <b>5.90E-11</b> | 0.013  | 0.002 | <b>1.50E-09</b> | 0.012  | 0.002 | <b>7.50E-12</b> |
| 7 | 35481642 | rs343004         | C   | A  | 0.32 | 0.009  | 0.002 | <b>9.00E-10</b> | 0.011  | 0.002 | <b>3.00E-08</b> | 0.010  | 0.002 | <b>4.10E-10</b> |
| 7 | 35482940 | rs343005         | G   | T  | 0.32 | 0.009  | 0.002 | <b>8.70E-10</b> | 0.011  | 0.002 | <b>2.60E-08</b> | 0.010  | 0.002 | <b>3.80E-10</b> |
| 7 | 35483018 | rs343006         | C   | A  | 0.32 | 0.009  | 0.002 | <b>9.10E-10</b> | 0.011  | 0.002 | <b>2.60E-08</b> | 0.010  | 0.002 | <b>4.00E-10</b> |
| 7 | 35483055 | rs343007         | G   | T  | 0.32 | 0.009  | 0.002 | <b>8.00E-10</b> | 0.011  | 0.002 | <b>2.60E-08</b> | 0.010  | 0.002 | <b>3.70E-10</b> |
| 7 | 35485648 | rs343010         | C   | A  | 0.32 | 0.009  | 0.002 | <b>7.50E-10</b> | 0.011  | 0.002 | <b>2.60E-08</b> | 0.010  | 0.002 | <b>3.40E-10</b> |

|   |          |                 |    |    |      |       |       |                 |       |       |                 |       |       |                 |
|---|----------|-----------------|----|----|------|-------|-------|-----------------|-------|-------|-----------------|-------|-------|-----------------|
| 7 | 35487040 | 7:35487040_CT_C | CT | C  | 0.29 | 0.011 | 0.002 | <b>3.20E-09</b> | 0.013 | 0.002 | <b>1.60E-08</b> | 0.011 | 0.002 | <b>5.30E-09</b> |
| 7 | 35488349 | rs343011        | T  | G  | 0.23 | 0.011 | 0.002 | <b>5.50E-11</b> | 0.013 | 0.002 | <b>1.50E-09</b> | 0.012 | 0.002 | <b>6.80E-12</b> |
| 7 | 35488769 | rs343012        | C  | A  | 0.32 | 0.009 | 0.002 | <b>7.40E-10</b> | 0.011 | 0.002 | <b>2.70E-08</b> | 0.010 | 0.002 | <b>3.40E-10</b> |
| 7 | 35491532 | rs343016        | G  | C  | 0.32 | 0.009 | 0.002 | <b>8.00E-10</b> | 0.011 | 0.002 | <b>2.60E-08</b> | 0.010 | 0.002 | <b>3.60E-10</b> |
| 7 | 35492168 | rs343019        | G  | C  | 0.41 | 0.009 | 0.001 | <b>7.10E-10</b> | 0.010 | 0.002 | 1.60E-07        | 0.009 | 0.001 | <b>3.00E-10</b> |
| 7 | 35493178 | rs343020        | T  | C  | 0.32 | 0.009 | 0.002 | <b>8.20E-10</b> | 0.011 | 0.002 | <b>2.40E-08</b> | 0.010 | 0.002 | <b>3.70E-10</b> |
| 7 | 35493309 | rs343021        | T  | C  | 0.32 | 0.009 | 0.002 | <b>8.10E-10</b> | 0.011 | 0.002 | <b>2.40E-08</b> | 0.010 | 0.002 | <b>3.70E-10</b> |
| 7 | 35493603 | rs343022        | C  | T  | 0.32 | 0.009 | 0.002 | <b>8.70E-10</b> | 0.011 | 0.002 | <b>2.20E-08</b> | 0.010 | 0.002 | <b>3.50E-10</b> |
| 7 | 35494013 | rs343024        | C  | G  | 0.41 | 0.009 | 0.001 | <b>5.80E-10</b> | 0.010 | 0.002 | 1.20E-07        | 0.009 | 0.001 | <b>2.40E-10</b> |
| 7 | 35494243 | rs777980        | G  | A  | 0.32 | 0.009 | 0.002 | <b>6.10E-10</b> | 0.011 | 0.002 | <b>1.70E-08</b> | 0.010 | 0.002 | <b>2.40E-10</b> |
| 7 | 35494556 | rs702843        | G  | C  | 0.41 | 0.009 | 0.001 | <b>3.90E-10</b> | 0.010 | 0.002 | <b>7.30E-08</b> | 0.009 | 0.001 | <b>1.40E-10</b> |
| 7 | 35495599 | rs343025        | T  | A  | 0.37 | 0.009 | 0.001 | <b>5.00E-09</b> | 0.010 | 0.002 | 2.80E-07        | 0.009 | 0.001 | <b>3.50E-09</b> |
| 7 | 35496678 | rs343026        | T  | G  | 0.32 | 0.009 | 0.002 | <b>5.20E-10</b> | 0.011 | 0.002 | <b>1.50E-08</b> | 0.010 | 0.002 | <b>2.40E-10</b> |
| 7 | 35497055 | rs35099106      | C  | CT | 0.23 | 0.011 | 0.002 | <b>3.70E-11</b> | 0.013 | 0.002 | <b>8.70E-10</b> | 0.012 | 0.002 | <b>4.10E-12</b> |
| 7 | 35498200 | rs343029        | A  | G  | 0.23 | 0.011 | 0.002 | <b>3.50E-11</b> | 0.013 | 0.002 | <b>8.90E-10</b> | 0.012 | 0.002 | <b>4.50E-12</b> |
| 7 | 35500493 | rs343031        | G  | A  | 0.32 | 0.009 | 0.002 | <b>5.00E-10</b> | 0.011 | 0.002 | <b>1.50E-08</b> | 0.010 | 0.002 | <b>2.20E-10</b> |
| 7 | 35501883 | rs343034        | C  | T  | 0.37 | 0.009 | 0.001 | <b>5.20E-09</b> | 0.010 | 0.002 | 2.70E-07        | 0.009 | 0.002 | <b>3.50E-09</b> |
| 7 | 35503445 | rs343036        | G  | C  | 0.23 | 0.011 | 0.002 | <b>3.50E-11</b> | 0.013 | 0.002 | <b>8.70E-10</b> | 0.012 | 0.002 | <b>5.30E-12</b> |
| 7 | 35503600 | rs343037        | G  | T  | 0.23 | 0.011 | 0.002 | <b>3.60E-11</b> | 0.013 | 0.002 | <b>8.70E-10</b> | 0.012 | 0.002 | <b>5.30E-12</b> |
| 7 | 35503696 | rs343038        | G  | C  | 0.32 | 0.009 | 0.002 | <b>4.70E-10</b> | 0.011 | 0.002 | <b>1.40E-08</b> | 0.010 | 0.002 | <b>2.40E-10</b> |
| 7 | 35505204 | rs343039        | C  | T  | 0.23 | 0.011 | 0.002 | <b>3.90E-11</b> | 0.013 | 0.002 | <b>7.90E-10</b> | 0.012 | 0.002 | <b>5.20E-12</b> |
| 7 | 35508859 | rs343044        | A  | G  | 0.20 | 0.010 | 0.002 | <b>3.60E-08</b> | 0.012 | 0.002 | 4.30E-07        | 0.011 | 0.002 | <b>5.20E-09</b> |
| 7 | 35509024 | rs343045        | C  | A  | 0.20 | 0.010 | 0.002 | <b>3.60E-08</b> | 0.012 | 0.002 | 4.40E-07        | 0.011 | 0.002 | <b>5.00E-09</b> |
| 7 | 35515295 | rs343048        | G  | A  | 0.20 | 0.010 | 0.002 | <b>3.30E-08</b> | 0.012 | 0.002 | 4.20E-07        | 0.011 | 0.002 | <b>4.30E-09</b> |
| 7 | 35519519 | rs343052        | G  | T  | 0.20 | 0.010 | 0.002 | <b>3.50E-08</b> | 0.012 | 0.002 | 4.20E-07        | 0.011 | 0.002 | <b>4.70E-09</b> |
| 7 | 35522553 | rs343053        | A  | G  | 0.17 | 0.011 | 0.002 | <b>4.30E-09</b> | 0.012 | 0.002 | 4.60E-07        | 0.011 | 0.002 | <b>3.90E-09</b> |
| 7 | 35523883 | rs343055        | G  | A  | 0.17 | 0.011 | 0.002 | <b>3.50E-09</b> | 0.013 | 0.002 | 2.90E-07        | 0.012 | 0.002 | <b>2.70E-09</b> |
| 7 | 35526022 | rs1646989       | T  | G  | 0.20 | 0.010 | 0.002 | <b>1.50E-08</b> | 0.012 | 0.002 | 1.60E-07        | 0.011 | 0.002 | <b>2.00E-09</b> |
| 7 | 35526024 | rs1646988       | T  | A  | 0.20 | 0.010 | 0.002 | <b>1.50E-08</b> | 0.012 | 0.002 | 1.60E-07        | 0.011 | 0.002 | <b>2.10E-09</b> |
| 7 | 35526390 | rs343056        | A  | G  | 0.20 | 0.010 | 0.002 | <b>7.00E-09</b> | 0.012 | 0.002 | 1.30E-07        | 0.011 | 0.002 | <b>9.70E-10</b> |

|   |          |                |        |   |      |        |       |                 |        |       |          |        |       |                 |
|---|----------|----------------|--------|---|------|--------|-------|-----------------|--------|-------|----------|--------|-------|-----------------|
| 7 | 35528567 | rs11766156     | G      | C | 0.80 | -0.010 | 0.002 | <b>7.40E-09</b> | -0.012 | 0.002 | 1.20E-07 | -0.011 | 0.002 | <b>8.90E-10</b> |
| 7 | 35532991 | rs73087411     | C      | T | 0.82 | -0.010 | 0.002 | <b>4.60E-08</b> | -0.011 | 0.002 | 2.80E-06 | -0.011 | 0.002 | <b>7.60E-09</b> |
| 8 | 6470650  | rs3020257      | C      | A | 0.76 | 0.010  | 0.002 | <b>6.60E-10</b> | 0.009  | 0.002 | 8.10E-05 | 0.009  | 0.002 | <b>3.30E-08</b> |
| 8 | 6471126  | rs2980664      | G      | A | 0.76 | 0.011  | 0.002 | <b>2.50E-10</b> | 0.009  | 0.002 | 2.60E-05 | 0.010  | 0.002 | <b>1.00E-08</b> |
| 8 | 6471182  | rs3020258      | C      | T | 0.78 | 0.010  | 0.002 | <b>2.00E-09</b> | 0.009  | 0.002 | 9.60E-05 | 0.009  | 0.002 | 9.90E-08        |
| 8 | 6471995  | rs2959802      | G      | A | 0.42 | -0.008 | 0.001 | <b>3.30E-08</b> | -0.007 | 0.002 | 9.20E-05 | -0.008 | 0.001 | 2.10E-07        |
| 8 | 6472105  | rs2959801      | G      | A | 0.69 | 0.010  | 0.002 | <b>2.00E-10</b> | 0.009  | 0.002 | 9.10E-06 | 0.010  | 0.002 | <b>4.80E-10</b> |
| 8 | 6472603  | rs11137038     | G      | A | 0.64 | 0.010  | 0.001 | <b>6.30E-11</b> | 0.008  | 0.002 | 2.00E-05 | 0.009  | 0.002 | <b>3.90E-09</b> |
| 8 | 6472721  | rs12543564     | T      | C | 0.67 | 0.009  | 0.002 | <b>1.30E-08</b> | 0.009  | 0.002 | 1.70E-05 | 0.009  | 0.002 | <b>3.70E-08</b> |
| 8 | 6472795  | rs3020259      | C      | A | 0.65 | 0.009  | 0.001 | <b>2.30E-10</b> | 0.008  | 0.002 | 2.10E-05 | 0.009  | 0.002 | <b>2.20E-08</b> |
| 8 | 6473118  | rs11998083     | C      | T | 0.64 | 0.010  | 0.001 | <b>4.50E-11</b> | 0.008  | 0.002 | 1.30E-05 | 0.009  | 0.002 | <b>4.20E-09</b> |
| 8 | 6473356  | rs1256         | C      | G | 0.70 | 0.010  | 0.002 | <b>1.80E-11</b> | 0.010  | 0.002 | 1.20E-06 | 0.010  | 0.002 | <b>1.10E-10</b> |
| 8 | 6473715  | rs2959799      | A      | G | 0.63 | 0.010  | 0.001 | <b>1.10E-10</b> | 0.008  | 0.002 | 1.80E-05 | 0.009  | 0.002 | <b>5.90E-09</b> |
| 8 | 6473746  | rs2959798      | A      | G | 0.63 | 0.009  | 0.001 | <b>1.20E-10</b> | 0.008  | 0.002 | 1.80E-05 | 0.009  | 0.002 | <b>6.20E-09</b> |
| 8 | 6473758  | rs2454517      | A      | G | 0.70 | 0.010  | 0.002 | <b>4.30E-11</b> | 0.010  | 0.002 | 2.40E-06 | 0.010  | 0.002 | <b>2.70E-10</b> |
| 8 | 6474136  | rs2936501      | A      | G | 0.63 | 0.009  | 0.001 | <b>1.60E-10</b> | 0.008  | 0.002 | 1.70E-05 | 0.009  | 0.002 | <b>7.90E-09</b> |
| 8 | 6475113  | rs2515557      | G      | A | 0.70 | 0.009  | 0.002 | <b>3.90E-08</b> | 0.008  | 0.002 | 6.60E-05 | 0.008  | 0.002 | 3.30E-07        |
| 8 | 6475489  | rs2980662      | G      | C | 0.69 | 0.009  | 0.002 | <b>2.60E-09</b> | 0.009  | 0.002 | 1.90E-05 | 0.009  | 0.002 | 5.40E-08        |
| 8 | 6476626  | rs7005662      | C      | T | 0.72 | 0.010  | 0.002 | <b>1.50E-10</b> | 0.010  | 0.002 | 2.50E-06 | 0.010  | 0.002 | <b>1.90E-09</b> |
| 8 | 6478481  | rs2253560      | G      | A | 0.72 | 0.010  | 0.002 | <b>7.80E-11</b> | 0.009  | 0.002 | 4.20E-06 | 0.010  | 0.002 | <b>2.90E-09</b> |
| 8 | 6478960  | rs11137040     | C      | G | 0.71 | 0.010  | 0.002 | <b>7.90E-10</b> | 0.009  | 0.002 | 2.70E-05 | 0.009  | 0.002 | <b>2.10E-08</b> |
| 8 | 6479178  | rs2912016      | C      | A | 0.65 | 0.009  | 0.001 | <b>6.70E-10</b> | 0.008  | 0.002 | 4.70E-05 | 0.008  | 0.002 | 1.30E-07        |
| 8 | 6479282  | rs11137041     | G      | T | 0.65 | 0.009  | 0.001 | <b>2.20E-09</b> | 0.008  | 0.002 | 7.30E-05 | 0.008  | 0.002 | 1.60E-07        |
| 8 | 6479432  | rs2515559      | A      | G | 0.72 | 0.010  | 0.002 | <b>5.10E-10</b> | 0.009  | 0.002 | 8.40E-06 | 0.009  | 0.002 | <b>1.50E-08</b> |
| 8 | 6479497  | rs2011423      | G      | A | 0.67 | 0.009  | 0.002 | <b>1.40E-09</b> | 0.008  | 0.002 | 4.10E-05 | 0.008  | 0.002 | 2.20E-07        |
| 8 | 6483059  | rs201338894    | ATAAAT | A | 0.73 | 0.011  | 0.002 | <b>9.30E-12</b> | 0.010  | 0.002 | 1.70E-06 | 0.010  | 0.002 | <b>6.60E-10</b> |
| 8 | 6483482  | rs2912057      | C      | T | 0.60 | 0.008  | 0.001 | <b>2.60E-08</b> | 0.008  | 0.002 | 4.10E-05 | 0.007  | 0.001 | 1.30E-06        |
| 8 | 6484505  | 8:6484505_CA_C | CA     | C | 0.72 | 0.011  | 0.002 | <b>3.10E-12</b> | 0.010  | 0.002 | 9.40E-07 | 0.010  | 0.002 | <b>2.30E-10</b> |
| 8 | 6484510  | rs2454524      | A      | C | 0.72 | 0.011  | 0.002 | <b>3.10E-12</b> | 0.010  | 0.002 | 9.50E-07 | 0.010  | 0.002 | <b>2.30E-10</b> |
| 8 | 6484530  | rs2246801      | C      | T | 0.72 | 0.011  | 0.002 | <b>4.50E-12</b> | 0.010  | 0.002 | 1.10E-06 | 0.010  | 0.002 | <b>3.80E-10</b> |

|   |           |                 |     |   |      |        |       |                 |        |       |          |        |       |                 |
|---|-----------|-----------------|-----|---|------|--------|-------|-----------------|--------|-------|----------|--------|-------|-----------------|
| 8 | 6484635   | rs2278147       | C   | A | 0.71 | 0.011  | 0.002 | <b>4.10E-13</b> | 0.010  | 0.002 | 6.10E-07 | 0.010  | 0.002 | <b>4.80E-11</b> |
| 8 | 6484982   | rs2448611       | C   | T | 0.70 | 0.010  | 0.002 | <b>1.50E-10</b> | 0.010  | 0.002 | 1.30E-06 | 0.009  | 0.002 | <b>4.40E-09</b> |
| 8 | 6485295   | rs2912062       | C   | G | 0.70 | 0.011  | 0.002 | <b>2.70E-13</b> | 0.010  | 0.002 | 2.70E-07 | 0.011  | 0.002 | <b>3.30E-11</b> |
| 8 | 6486033   | rs2912063       | A   | G | 0.71 | 0.011  | 0.002 | <b>4.20E-13</b> | 0.010  | 0.002 | 4.80E-07 | 0.011  | 0.002 | <b>4.40E-11</b> |
| 8 | 6487449   | rs3020263       | G   | A | 0.72 | 0.011  | 0.002 | <b>4.40E-12</b> | 0.010  | 0.002 | 1.00E-06 | 0.010  | 0.002 | <b>2.40E-10</b> |
| 8 | 6487727   | rs2936511       | C   | G | 0.63 | 0.008  | 0.001 | <b>2.20E-08</b> | 0.007  | 0.002 | 5.30E-04 | 0.007  | 0.001 | 2.60E-06        |
| 8 | 6488317   | rs569123053     | A   | C | 0.80 | 0.011  | 0.002 | <b>2.70E-09</b> | 0.010  | 0.002 | 6.50E-05 | 0.010  | 0.002 | 2.60E-07        |
| 8 | 6488505   | rs2911968       | T   | C | 0.62 | 0.008  | 0.001 | <b>2.30E-08</b> | 0.007  | 0.002 | 4.20E-04 | 0.007  | 0.001 | 2.40E-06        |
| 8 | 6488577   | rs3020264       | G   | A | 0.72 | 0.011  | 0.002 | <b>5.80E-12</b> | 0.010  | 0.002 | 1.40E-06 | 0.010  | 0.002 | <b>4.30E-10</b> |
| 8 | 6488710   | rs2912064       | C   | T | 0.65 | 0.009  | 0.001 | <b>2.60E-10</b> | 0.008  | 0.002 | 1.10E-04 | 0.008  | 0.002 | 8.20E-08        |
| 8 | 6488787   | rs1974946       | G   | A | 0.72 | 0.011  | 0.002 | <b>5.70E-12</b> | 0.010  | 0.002 | 1.60E-06 | 0.010  | 0.002 | <b>4.00E-10</b> |
| 8 | 6488921   | rs3020265       | G   | A | 0.63 | 0.008  | 0.001 | <b>1.60E-08</b> | 0.007  | 0.002 | 3.30E-04 | 0.007  | 0.001 | 1.50E-06        |
| 8 | 6488990   | 8:6488990_CA_C  | CA  | C | 0.62 | 0.008  | 0.001 | <b>2.40E-08</b> | 0.007  | 0.002 | 3.60E-04 | 0.007  | 0.002 | 4.00E-06        |
| 8 | 6490200   | rs2433143       | C   | T | 0.73 | 0.010  | 0.002 | <b>6.50E-11</b> | 0.009  | 0.002 | 3.40E-05 | 0.010  | 0.002 | <b>1.20E-09</b> |
| 8 | 6490544   | 8:6490544_TA_T  | TA  | T | 0.70 | 0.010  | 0.002 | <b>2.00E-11</b> | 0.008  | 0.002 | 3.90E-05 | 0.010  | 0.002 | <b>9.60E-10</b> |
| 8 | 6490975   | rs2515561       | G   | A | 0.66 | 0.009  | 0.001 | <b>6.70E-10</b> | 0.007  | 0.002 | 2.60E-04 | 0.008  | 0.002 | <b>2.60E-08</b> |
| 8 | 6491181   | rs1834451       | T   | C | 0.61 | 0.009  | 0.001 | <b>1.60E-09</b> | 0.007  | 0.002 | 2.70E-04 | 0.008  | 0.001 | 7.10E-08        |
| 8 | 6492014   | 8:6492014_CTG_C | CTG | C | 0.67 | 0.008  | 0.002 | <b>1.90E-08</b> | 0.006  | 0.002 | 9.60E-04 | 0.008  | 0.002 | 7.30E-07        |
| 8 | 6492391   | rs2980655       | A   | T | 0.67 | 0.009  | 0.002 | <b>6.70E-09</b> | 0.007  | 0.002 | 4.70E-04 | 0.008  | 0.002 | 3.10E-07        |
| 8 | 6492498   | rs3020266       | G   | A | 0.67 | 0.009  | 0.002 | <b>8.20E-09</b> | 0.007  | 0.002 | 5.20E-04 | 0.008  | 0.002 | 3.70E-07        |
| 8 | 6492792   | 8:6492792_AC_A  | AC  | A | 0.66 | 0.009  | 0.002 | <b>1.10E-08</b> | 0.007  | 0.002 | 5.00E-04 | 0.008  | 0.002 | 2.30E-07        |
| 8 | 6493910   | rs2042670       | A   | C | 0.66 | 0.008  | 0.001 | <b>1.40E-08</b> | 0.006  | 0.002 | 1.80E-03 | 0.008  | 0.002 | 5.60E-07        |
| 8 | 6494850   | rs2515563       | G   | C | 0.69 | 0.010  | 0.002 | <b>2.50E-10</b> | 0.008  | 0.002 | 9.50E-05 | 0.009  | 0.002 | <b>1.20E-08</b> |
| 8 | 124579985 | rs6470156       | G   | A | 0.73 | -0.011 | 0.002 | <b>5.30E-13</b> | -0.009 | 0.002 | 2.10E-05 | -0.010 | 0.002 | <b>1.90E-09</b> |
| 8 | 124594184 | rs13270370      | G   | A | 0.55 | -0.008 | 0.001 | <b>2.40E-08</b> | -0.006 | 0.002 | 2.60E-03 | -0.007 | 0.001 | 4.20E-06        |
| 8 | 124594923 | rs11776999      | G   | A | 0.80 | -0.010 | 0.002 | <b>3.50E-08</b> | -0.008 | 0.002 | 5.40E-04 | -0.009 | 0.002 | 1.50E-06        |
| 8 | 124599786 | rs13251106      | C   | T | 0.80 | -0.010 | 0.002 | <b>3.60E-08</b> | -0.008 | 0.002 | 5.60E-04 | -0.009 | 0.002 | 1.50E-06        |
| 8 | 124601535 | rs12547541      | G   | A | 0.80 | -0.010 | 0.002 | <b>3.70E-08</b> | -0.008 | 0.002 | 5.50E-04 | -0.009 | 0.002 | 1.60E-06        |
| 8 | 124602054 | rs35534969      | A   | C | 0.55 | -0.008 | 0.001 | <b>2.20E-08</b> | -0.006 | 0.002 | 2.40E-03 | -0.007 | 0.001 | 5.50E-06        |
| 8 | 124607159 | rs34557926      | C   | T | 0.64 | -0.011 | 0.001 | <b>1.40E-13</b> | -0.008 | 0.002 | 2.60E-05 | -0.009 | 0.002 | <b>1.00E-09</b> |

|    |           |             |    |          |      |        |       |                 |        |       |          |        |       |                 |
|----|-----------|-------------|----|----------|------|--------|-------|-----------------|--------|-------|----------|--------|-------|-----------------|
| 8  | 124608162 | rs2891781   | C  | T        | 0.64 | -0.011 | 0.001 | <b>2.70E-13</b> | -0.008 | 0.002 | 3.90E-05 | -0.009 | 0.002 | <b>1.20E-09</b> |
| 8  | 124608614 | rs7006122   | T  | G        | 0.64 | -0.011 | 0.001 | <b>3.10E-13</b> | -0.008 | 0.002 | 4.50E-05 | -0.009 | 0.002 | <b>1.40E-09</b> |
| 10 | 30138169  | rs7912501   | A  | G        | 0.30 | 0.009  | 0.002 | <b>2.40E-08</b> | 0.007  | 0.002 | 1.20E-03 | 0.008  | 0.002 | 1.10E-07        |
| 10 | 30138411  | rs6481643   | T  | C        | 0.30 | 0.009  | 0.002 | <b>2.20E-08</b> | 0.007  | 0.002 | 1.20E-03 | 0.008  | 0.002 | 1.00E-07        |
| 10 | 30144471  | rs10763762  | T  | C        | 0.30 | 0.008  | 0.002 | <b>4.80E-08</b> | 0.006  | 0.002 | 1.60E-03 | 0.008  | 0.002 | 2.10E-07        |
| 10 | 30161168  | rs1929257   | A  | G        | 0.31 | 0.009  | 0.002 | <b>6.00E-09</b> | 0.007  | 0.002 | 5.70E-04 | 0.009  | 0.002 | <b>1.80E-08</b> |
| 10 | 30162423  | rs2150562   | A  | G        | 0.31 | 0.009  | 0.002 | <b>8.70E-09</b> | 0.007  | 0.002 | 5.60E-04 | 0.009  | 0.002 | <b>1.70E-08</b> |
| 10 | 30163133  | rs777393148 | TC | T        | 0.31 | 0.008  | 0.002 | <b>3.30E-08</b> | 0.007  | 0.002 | 1.00E-03 | 0.008  | 0.002 | 6.20E-08        |
| 10 | 30165983  | rs7096778   | T  | C        | 0.41 | 0.008  | 0.001 | <b>1.60E-08</b> | 0.007  | 0.002 | 1.40E-04 | 0.008  | 0.001 | 1.60E-07        |
| 10 | 30166035  | rs7078837   | C  | A        | 0.41 | 0.008  | 0.001 | <b>1.40E-08</b> | 0.007  | 0.002 | 1.10E-04 | 0.008  | 0.001 | 1.30E-07        |
| 10 | 30166547  | rs10826719  | G  | A        | 0.41 | 0.008  | 0.001 | <b>1.70E-08</b> | 0.007  | 0.002 | 1.30E-04 | 0.008  | 0.001 | 1.80E-07        |
| 10 | 30167009  | rs1571759   | T  | C        | 0.41 | 0.008  | 0.001 | <b>1.30E-08</b> | 0.007  | 0.002 | 1.20E-04 | 0.008  | 0.001 | 1.50E-07        |
| 10 | 30167754  | rs10740811  | G  | A        | 0.41 | 0.008  | 0.001 | <b>1.10E-08</b> | 0.007  | 0.002 | 8.50E-05 | 0.008  | 0.001 | 1.20E-07        |
| 10 | 30168031  | rs2369339   | T  | C        | 0.32 | 0.009  | 0.002 | <b>5.10E-09</b> | 0.007  | 0.002 | 2.60E-04 | 0.009  | 0.002 | <b>2.00E-08</b> |
| 10 | 30168699  | rs2202      | C  | T        | 0.32 | 0.009  | 0.002 | <b>8.80E-09</b> | 0.007  | 0.002 | 2.80E-04 | 0.009  | 0.002 | <b>2.80E-08</b> |
| 10 | 30169653  | rs10763764  | A  | T        | 0.42 | 0.008  | 0.001 | <b>1.10E-08</b> | 0.007  | 0.002 | 8.60E-05 | 0.008  | 0.001 | 1.00E-07        |
| 10 | 30170487  | rs914279    | T  | G        | 0.42 | 0.008  | 0.001 | <b>6.80E-09</b> | 0.007  | 0.002 | 7.00E-05 | 0.008  | 0.001 | 5.80E-08        |
| 11 | 103660567 | rs974819    | T  | C        | 0.29 | 0.010  | 0.002 | <b>5.60E-10</b> | 0.010  | 0.002 | 3.70E-07 | 0.010  | 0.002 | <b>8.30E-10</b> |
| 11 | 103668962 | rs2019090   | A  | T        | 0.29 | 0.010  | 0.002 | <b>3.70E-10</b> | 0.010  | 0.002 | 3.30E-07 | 0.010  | 0.002 | <b>6.40E-10</b> |
| 11 | 103669291 | rs796784254 | T  | TTATTGAA | 0.29 | 0.010  | 0.002 | <b>5.80E-10</b> | 0.010  | 0.002 | 4.20E-07 | 0.010  | 0.002 | <b>7.80E-10</b> |
| 11 | 103673277 | rs2128739   | A  | C        | 0.28 | 0.009  | 0.002 | <b>2.20E-09</b> | 0.010  | 0.002 | 1.10E-06 | 0.009  | 0.002 | <b>3.60E-09</b> |
| 11 | 103673294 | rs2839812   | T  | A        | 0.28 | 0.009  | 0.002 | <b>2.20E-09</b> | 0.010  | 0.002 | 1.10E-06 | 0.009  | 0.002 | <b>3.60E-09</b> |
| 11 | 103693627 | rs11226029  | G  | A        | 0.29 | 0.009  | 0.002 | <b>1.10E-08</b> | 0.009  | 0.002 | 3.30E-06 | 0.009  | 0.002 | <b>3.10E-08</b> |
| 11 | 103696851 | rs1384705   | C  | T        | 0.29 | 0.009  | 0.002 | <b>1.30E-08</b> | 0.009  | 0.002 | 3.20E-06 | 0.009  | 0.002 | <b>3.60E-08</b> |
| 13 | 111049623 | rs9515203   | T  | C        | 0.74 | -0.009 | 0.002 | <b>1.10E-08</b> | -0.009 | 0.002 | 1.20E-05 | -0.009 | 0.002 | 1.80E-07        |
| 16 | 88966667  | rs844396    | C  | T        | 0.68 | 0.008  | 0.002 | <b>4.50E-08</b> | 0.009  | 0.002 | 1.40E-05 | 0.008  | 0.002 | 2.30E-07        |
| 16 | 88968540  | rs564669    | T  | C        | 0.62 | 0.008  | 0.001 | <b>4.30E-08</b> | 0.008  | 0.002 | 2.70E-05 | 0.008  | 0.001 | 2.90E-07        |
| 16 | 88969969  | rs865102    | A  | G        | 0.65 | 0.008  | 0.001 | <b>9.10E-09</b> | 0.008  | 0.002 | 1.30E-05 | 0.008  | 0.002 | 1.30E-07        |
| 16 | 88970040  | rs4995274   | T  | C        | 0.65 | 0.008  | 0.001 | <b>3.20E-08</b> | 0.008  | 0.002 | 2.90E-05 | 0.008  | 0.002 | 3.50E-07        |

|    |          |             |   |   |      |        |       |                 |        |       |                 |        |       |                 |
|----|----------|-------------|---|---|------|--------|-------|-----------------|--------|-------|-----------------|--------|-------|-----------------|
| 16 | 88970776 | rs475796    | C | G | 0.65 | 0.008  | 0.001 | <b>1.00E-08</b> | 0.008  | 0.002 | 1.40E-05        | 0.008  | 0.002 | 1.40E-07        |
| 16 | 88970818 | rs561795    | A | G | 0.65 | 0.008  | 0.001 | <b>1.30E-08</b> | 0.008  | 0.002 | 1.30E-05        | 0.008  | 0.002 | 1.50E-07        |
| 16 | 88972554 | rs488251    | G | A | 0.68 | 0.008  | 0.002 | <b>3.30E-08</b> | 0.008  | 0.002 | 4.00E-05        | 0.008  | 0.002 | 4.90E-07        |
| 16 | 88974516 | rs548591    | A | G | 0.62 | 0.008  | 0.001 | <b>1.80E-08</b> | 0.008  | 0.002 | 1.60E-05        | 0.008  | 0.001 | 2.70E-07        |
| 16 | 88974860 | rs533406    | A | G | 0.62 | 0.008  | 0.001 | <b>2.70E-08</b> | 0.008  | 0.002 | 2.40E-05        | 0.008  | 0.001 | 3.30E-07        |
| 16 | 88975447 | rs8058234   | C | G | 0.62 | 0.008  | 0.001 | <b>3.20E-08</b> | 0.008  | 0.002 | 4.10E-05        | 0.008  | 0.001 | 4.40E-07        |
| 16 | 88975910 | rs7405380   | G | C | 0.62 | 0.008  | 0.001 | <b>2.20E-08</b> | 0.008  | 0.002 | 3.80E-05        | 0.008  | 0.001 | 3.40E-07        |
| 16 | 88975954 | rs7404039   | A | G | 0.62 | 0.008  | 0.001 | <b>2.70E-08</b> | 0.008  | 0.002 | 5.20E-05        | 0.008  | 0.001 | 4.30E-07        |
| 16 | 88976477 | rs1673931   | T | C | 0.62 | 0.008  | 0.001 | <b>2.30E-08</b> | 0.008  | 0.002 | 3.50E-05        | 0.008  | 0.001 | 3.80E-07        |
| 16 | 88976968 | rs529900    | G | C | 0.62 | 0.008  | 0.001 | <b>2.50E-08</b> | 0.008  | 0.002 | 3.90E-05        | 0.008  | 0.001 | 3.50E-07        |
| 16 | 88982789 | rs12444726  | G | T | 0.63 | 0.008  | 0.001 | <b>4.70E-08</b> | 0.007  | 0.002 | 2.90E-04        | 0.007  | 0.001 | 2.30E-06        |
| 16 | 88987861 | rs1673932   | T | C | 0.63 | 0.008  | 0.001 | <b>3.50E-08</b> | 0.008  | 0.002 | 5.30E-05        | 0.007  | 0.001 | 8.60E-07        |
| 16 | 88988989 | rs561732    | T | C | 0.65 | 0.008  | 0.001 | <b>4.70E-08</b> | 0.008  | 0.002 | 3.80E-05        | 0.007  | 0.002 | 7.10E-07        |
| 19 | 41188985 | rs113228202 | G | A | 0.99 | -0.036 | 0.007 | <b>3.40E-08</b> | -0.034 | 0.008 | 6.70E-05        | -0.036 | 0.007 | 8.40E-08        |
| 19 | 41333152 | rs111689747 | G | A | 0.99 | -0.040 | 0.006 | <b>7.10E-10</b> | -0.044 | 0.008 | 2.20E-07        | -0.039 | 0.007 | <b>4.40E-09</b> |
| 19 | 41371458 | rs111240159 | C | T | 0.99 | -0.037 | 0.006 | <b>4.00E-09</b> | -0.041 | 0.008 | 3.60E-07        | -0.037 | 0.006 | <b>8.30E-09</b> |
| 19 | 45337737 | rs11667253  | C | T | 0.30 | -0.009 | 0.002 | <b>2.70E-08</b> | -0.009 | 0.002 | 1.10E-05        | -0.009 | 0.002 | <b>2.60E-08</b> |
| 19 | 45338220 | rs4369782   | A | G | 0.30 | -0.009 | 0.002 | <b>2.90E-08</b> | -0.009 | 0.002 | 9.60E-06        | -0.009 | 0.002 | <b>2.80E-08</b> |
| 19 | 45338493 | rs4605275   | T | C | 0.30 | -0.009 | 0.002 | <b>3.40E-08</b> | -0.009 | 0.002 | 9.20E-06        | -0.009 | 0.002 | <b>2.70E-08</b> |
| 19 | 45341948 | rs10407439  | A | G | 0.30 | -0.009 | 0.002 | <b>2.30E-08</b> | -0.009 | 0.002 | 9.90E-06        | -0.009 | 0.002 | <b>2.40E-08</b> |
| 19 | 45342241 | rs4239533   | A | G | 0.30 | -0.009 | 0.002 | <b>1.80E-08</b> | -0.009 | 0.002 | 8.50E-06        | -0.009 | 0.002 | <b>2.10E-08</b> |
| 19 | 45397229 | rs1160983   | G | A | 0.97 | 0.023  | 0.004 | <b>4.70E-08</b> | 0.030  | 0.005 | <b>1.70E-08</b> | 0.026  | 0.004 | <b>3.90E-10</b> |
| 19 | 45412079 | rs7412      | C | T | 0.92 | 0.021  | 0.003 | <b>2.10E-15</b> | 0.025  | 0.003 | <b>1.00E-13</b> | 0.022  | 0.003 | <b>1.40E-16</b> |
| 19 | 45413233 | rs1065853   | G | T | 0.92 | 0.021  | 0.003 | <b>1.60E-15</b> | 0.026  | 0.003 | <b>6.90E-14</b> | 0.023  | 0.003 | <b>7.80E-17</b> |
| 19 | 45414399 | rs72654473  | C | A | 0.90 | 0.013  | 0.002 | <b>2.40E-08</b> | 0.017  | 0.003 | <b>8.70E-09</b> | 0.014  | 0.002 | <b>1.60E-09</b> |
| 19 | 45415640 | rs445925    | G | A | 0.89 | 0.013  | 0.002 | <b>3.20E-08</b> | 0.017  | 0.003 | <b>1.30E-08</b> | 0.014  | 0.002 | <b>2.50E-09</b> |
| 19 | 45416831 | rs390082    | T | G | 0.89 | 0.013  | 0.002 | <b>4.10E-08</b> | 0.017  | 0.003 | <b>2.00E-08</b> | 0.014  | 0.002 | <b>3.50E-09</b> |
| 19 | 45425178 | rs190712692 | G | A | 0.95 | 0.023  | 0.003 | <b>1.30E-12</b> | 0.028  | 0.004 | <b>7.80E-11</b> | 0.025  | 0.003 | <b>4.00E-14</b> |
| 19 | 45426792 | rs141622900 | G | A | 0.95 | 0.023  | 0.003 | <b>1.90E-12</b> | 0.026  | 0.004 | <b>4.00E-10</b> | 0.025  | 0.003 | <b>7.50E-14</b> |

Supplemental Table II: Effects of previously reported IMT loci in the UKB GWAS

| Franceshini  |     |                     |                      |                         |                  |                      | UKB                  |         |         |                 |         |                 |   |
|--------------|-----|---------------------|----------------------|-------------------------|------------------|----------------------|----------------------|---------|---------|-----------------|---------|-----------------|---|
| SNP          | Chr | Nearest Coding Gene | Alleles Effect/Other | Effect allele frequency | Beta (SE)        | p-value              | Alleles Effect/Other | IMTmean |         | IMTmeanmax      |         | consistent      |   |
|              |     |                     |                      |                         |                  |                      |                      | A1freq  | beta    | P               | beta    |                 | P |
| rs201648240  | 1   |                     | D/I                  | 0.83                    | -0.0062 (0.0011) | $3.6 \times 10^{-9}$ |                      |         |         |                 |         |                 |   |
| rs224904     | 5   | <i>ATP6AP1L</i>     | C/G                  | 0.95                    | -0.0088 (0.0016) | $5.1 \times 10^{-8}$ | G/C                  | 0.05    | 0.0163  | 7.20E-07        | 0.0153  | 2.10E-06        | y |
| rs6907215    | 6   | <i>AIG1</i>         | T/C                  | 0.6                     | -0.0040 (0.0007) | $4.7 \times 10^{-8}$ | C/T                  | 0.40    | 0.0060  | 6.80E-05        | 0.0060  | 4.80E-05        | Y |
| rs13225723   | 7   | <i>PIK3CG</i>       | A/G                  | 0.22                    | 0.0052 (0.0009)  | $3.2 \times 10^{-9}$ | G/A                  | 0.89    | -0.0097 | 0.0004          | -0.0078 | 0.0031          | y |
| rs2912063    | 8   | <i>MCPH1</i>        | A/G                  | 0.71                    | 0.0045 (0.0008)  | $8.9 \times 10^{-9}$ | A/G                  | 0.71    | 0.0122  | <b>8.3E-14</b>  | 0.0105  | <b>4.40E-11</b> | y |
| rs11785239   | 8   | <i>SGK223</i>       | T/C                  | 0.65                    | -0.0043 (0.0008) | $8.7 \times 10^{-9}$ | C/T                  | 0.37    | -0.0045 | 0.0033          | -0.0057 | 0.0002          | n |
| rs11196033   | 10  | <i>VTI1A</i>        | A/C                  | 0.48                    | 0.0042 (0.0008)  | $3.9 \times 10^{-8}$ | C/A                  | 0.49    | 0.0011  | 0.4500          | 0.0007  | 0.6400          | n |
| rs844396     | 16  | <i>CBFA2T3</i>      | T/C                  | 0.3                     | -0.0051 (0.0009) | $6.0 \times 10^{-9}$ | C/T                  | 0.68    | 0.0086  | <b>4.80E-08</b> | 0.0080  | 2.30E-07        | y |
| rs148147734* | 8   | <i>ZHX2</i>         | -/G                  | 0.54                    | 0.0050 (0.0007)  | $3 \times 10^{-11}$  | G/A                  | 0.54    | 0.0015  | 3.70E-05        | 0.0056  | 0.0001          | y |
| rs200482500  | 8   | <i>PINX1</i>        | -/GTACC              | 0.52                    | 0.0056 (0.0008)  | $7 \times 10^{-12}$  |                      |         |         |                 |         |                 |   |
| rs7412       | 19  | <i>APOE</i>         | T/C                  | 0.08                    | -0.0119 (0.0015) | $1 \times 10^{-14}$  | C/T                  | 0.92    | 0.0214  | <b>7.1E-15</b>  | 0.0224  | <b>1.40E-16</b> | y |

Where: \*Published cIMT SNP in LD with our most significant SNP: rs11781551 ( $r^2 = 0.95$  with rs148147734)

Supplemental Table III: Effects of GWAS-significant loci reported here in the CHARGE meta-analysis of IMT.

| UKB                     |              |     |    |         |              |           |                 |              |    | Franceschini et al |        |                 |         |               |            |
|-------------------------|--------------|-----|----|---------|--------------|-----------|-----------------|--------------|----|--------------------|--------|-----------------|---------|---------------|------------|
| Analysis                | SNP          | CHR | A1 | A1 freq | IMTmean beta | IMTmean P | IMTmeanmax beta | IMTmeanmax P | A1 | Freq               | Beta   | Meta P          | Het ISq | Het PVal      | Consistent |
| IMTmean sex combined    | rs758080886  | 5   | CA | 0.15    | 0.013        | 3.10E-08  | 0.011           | 1.60E-06     |    |                    |        |                 |         |               |            |
|                         | rs342988*, § | 7   | C  | 0.28    | 0.011        | 3.00E-11  | 0.011           | 1.30E-12     | T  | 0.75               | -0.003 | 1.53E-04        | 7.4     | 0.3533        | y          |
|                         | rs2912062†   | 8   | C  | 0.71    | 0.012        | 6.70E-14  | 0.011           | 3.30E-11     | C  | 0.70               | 0.004  | 5.53E-08        | 2.6     | 0.4260        | y          |
|                         | rs34557926§  | 8   | C  | 0.64    | -0.011       | 2.90E-12  | -0.009          | 1.00E-09     | T  | 0.38               | 0.004  | 3.45E-06        | 0       | 0.7801        | y          |
|                         | rs2019090§   | 11  | A  | 0.29    | 0.009        | 8.20E-09  | 0.010           | 6.40E-10     | A  | 0.28               | 0.002  | 0.0046          | 25.3    | 0.1048        | y          |
|                         | rs561732     | 16  | T  | 0.65    | 0.009        | 3.60E-09  | 0.007           | 7.10E-07     | T  | 0.67               | 0.004  | 1.95E-06        | 56.9    | <b>0.0012</b> | y          |
|                         | rs111689747§ | 19  | G  | 0.99    | -0.044       | 1.20E-10  | -0.039          | 4.40E-09     |    |                    |        |                 |         |               |            |
|                         | rs1065853‡   | 19  | G  | 0.92    | 0.021        | 6.20E-15  | 0.023           | 7.80E-17     |    |                    |        |                 |         |               |            |
| IMTmax sex combined     | rs11762074*  | 7   | T  | 0.77    | -0.014       | 4.30E-10  | -0.012          | 2.70E-12     | T  | 0.79               | -0.004 | 5.94E-07        | 27.6    | 0.0829        | y          |
|                         | rs11025608§  | 11  | G  | 0.44    | -0.010       | 3.20E-08  | -0.007          | 6.50E-07     | T  | 0.57               | -0.001 | 0.1911          | 32.1    | 0.0566        | N          |
|                         | rs1065853‡   | 19  | G  | 0.92    | 0.026        | 6.90E-14  | 0.023           | 7.80E-17     |    |                    |        |                 |         |               |            |
| IMTmeanmax sex combined | rs2150562    | 10  | A  | 0.31    | 0.008        | 1.50E-06  | 0.009           | 1.70E-08     | A  | 0.34               | 0.003  | 0.0003          | 0       | 0.4714        | Y          |
| IMTmean Men             | rs35099106*  | 7   | C  | 0.24    | 0.016        | 5.20E-09  | 0.012           | 4.10E-12     | C  | 0.21               | 0.005  | 3.65E-07        | 37.5    | <b>0.0290</b> | y          |
|                         | rs2912063†   | 8   | A  | 0.71    | 0.017        | 2.60E-11  | 0.011           | 4.40E-11     | A  | 0.71               | 0.005  | <b>8.96E-09</b> | 9       | 0.3292        | y          |
|                         | rs1065853‡   | 19  | G  | 0.92    | 0.027        | 4.00E-10  | 0.023           | 7.80E-17     |    |                    |        |                 |         |               |            |
| IMTmean Women           | rs309563§    | 5   | A  | 0.66    | -0.012       | 8.90E-10  | -0.007          | 5.40E-06     | A  | 0.66               | -0.003 | 1.10E-05        | 13.5    | 0.2591        | y          |

Where: \*, LD between rs342988, rs11762074 and rs35099106 suggests that these SNPs represent 1 signal; †, LD between rs2912063 and rs2912063 indicate that these SNPs are proxies; ‡, consistent lead SNP convincingly demonstrates that the same locus is being identified; §, novel locus.



Supplemental Table IV: Comparison of GWAS significant SNPs for IMTmean in men and women

| CHR | BP       | SNP                | ALLELE1 | ALLELE0 | women |        |       |          | men  |        |       |          | Sex difference |               |
|-----|----------|--------------------|---------|---------|-------|--------|-------|----------|------|--------|-------|----------|----------------|---------------|
|     |          |                    |         |         | A1F   | BETA   | SE    | P        | A1F  | BETA   | SE    | P        | i2             | P             |
| 5   | 82870033 | 5:82870033_TC_T    | TC      | T       | 0.65  | -0.011 | 0.002 | 3.50E-08 | 0.66 | -0.002 | 0.002 | 4.80E-01 |                |               |
| 5   | 82871546 | rs309581           | T       | C       | 0.65  | -0.011 | 0.002 | 2.00E-08 | 0.66 | -0.002 | 0.002 | 4.90E-01 | 0.88           | <b>0.0033</b> |
| 5   | 82871657 | rs309580           | A       | T       | 0.65  | -0.011 | 0.002 | 2.50E-08 | 0.66 | -0.002 | 0.002 | 4.40E-01 | 0.88           | <b>0.0042</b> |
| 5   | 82873262 | rs309579           | G       | T       | 0.65  | -0.011 | 0.002 | 2.20E-08 | 0.66 | -0.002 | 0.002 | 4.00E-01 | 0.87           | <b>0.0048</b> |
| 5   | 82874549 | rs309578           | G       | A       | 0.65  | -0.011 | 0.002 | 2.50E-08 | 0.66 | -0.002 | 0.002 | 4.40E-01 | 0.88           | <b>0.0042</b> |
| 5   | 82874942 | rs309577           | T       | A       | 0.65  | -0.011 | 0.002 | 1.20E-08 | 0.65 | -0.002 | 0.002 | 3.30E-01 | 0.87           | <b>0.0055</b> |
| 5   | 82878519 | rs178024           | G       | A       | 0.65  | -0.011 | 0.002 | 1.70E-08 | 0.66 | -0.003 | 0.002 | 2.40E-01 | 0.85           | <b>0.0097</b> |
| 5   | 82882637 | rs10646744         | G       | GAAAA   | 0.64  | -0.011 | 0.002 | 3.60E-08 | 0.64 | -0.002 | 0.002 | 3.20E-01 |                |               |
| 5   | 82884891 | rs310520           | T       | A       | 0.65  | -0.011 | 0.002 | 1.10E-08 | 0.66 | -0.003 | 0.002 | 2.50E-01 | 0.86           | <b>0.0082</b> |
| 5   | 82885467 | 5:82885467_ACTCT_A | ACTCT   | A       | 0.65  | -0.011 | 0.002 | 4.50E-08 | 0.65 | -0.002 | 0.002 | 3.20E-01 |                |               |
| 5   | 82886448 | 5:82886448_AAAC_A  | AAAC    | A       | 0.65  | -0.011 | 0.002 | 4.60E-08 | 0.65 | -0.002 | 0.002 | 3.20E-01 |                |               |
| 5   | 82887835 | rs4260646          | A       | G       | 0.65  | -0.011 | 0.002 | 4.00E-08 | 0.65 | -0.002 | 0.002 | 3.90E-01 | 0.87           | <b>0.0063</b> |
| 5   | 82887839 | rs3864259          | C       | T       | 0.65  | -0.011 | 0.002 | 4.00E-08 | 0.65 | -0.002 | 0.002 | 3.80E-01 | 0.86           | <b>0.0066</b> |
| 5   | 82888812 | rs310498           | T       | C       | 0.64  | -0.011 | 0.002 | 3.20E-08 | 0.65 | -0.003 | 0.002 | 2.80E-01 | 0.85           | <b>0.0097</b> |
| 5   | 82890586 | rs753731735        | ATCAG   | A       | 0.66  | -0.011 | 0.002 | 2.80E-08 | 0.66 | -0.003 | 0.002 | 1.70E-01 |                |               |
| 5   | 82891343 | rs310502           | A       | T       | 0.65  | -0.011 | 0.002 | 2.20E-08 | 0.65 | -0.003 | 0.002 | 2.30E-01 | 0.84           | <b>0.0116</b> |
| 5   | 82891552 | rs310503           | G       | T       | 0.66  | -0.012 | 0.002 | 2.40E-09 | 0.66 | -0.003 | 0.002 | 1.80E-01 | 0.86           | <b>0.0085</b> |
| 5   | 82896644 | rs309563           | A       | T       | 0.66  | -0.012 | 0.002 | 8.90E-10 | 0.66 | -0.003 | 0.003 | 2.30E-01 | 0.88           | <b>0.0044</b> |
| 5   | 82898246 | rs309570           | T       | G       | 0.66  | -0.012 | 0.002 | 1.90E-09 | 0.67 | -0.003 | 0.002 | 2.00E-01 | 0.86           | <b>0.0067</b> |
| 5   | 82899830 | rs309574           | C       | T       | 0.66  | -0.012 | 0.002 | 2.10E-09 | 0.67 | -0.003 | 0.002 | 2.00E-01 | 0.86           | <b>0.0072</b> |
| 5   | 82900450 | rs309575           | C       | A       | 0.66  | -0.012 | 0.002 | 2.60E-09 | 0.67 | -0.003 | 0.002 | 1.90E-01 | 0.86           | <b>0.0079</b> |
| 5   | 82902032 | rs1673051          | G       | A       | 0.66  | -0.012 | 0.002 | 1.40E-09 | 0.67 | -0.003 | 0.002 | 2.90E-01 | 0.88           | <b>0.0035</b> |
| 5   | 82902267 | rs12153581         | A       | T       | 0.66  | -0.012 | 0.002 | 1.40E-09 | 0.67 | -0.003 | 0.002 | 2.90E-01 | 0.88           | <b>0.0035</b> |
| 5   | 82904002 | rs617228           | C       | G       | 0.66  | -0.012 | 0.002 | 1.20E-09 | 0.67 | -0.003 | 0.002 | 2.90E-01 | 0.88           | <b>0.0033</b> |
| 5   | 82905733 | rs471580           | C       | T       | 0.66  | -0.012 | 0.002 | 1.30E-09 | 0.67 | -0.003 | 0.002 | 3.00E-01 | 0.88           | <b>0.0033</b> |
| 5   | 82909489 | rs796444361        | AC      | A       | 0.64  | -0.012 | 0.002 | 2.40E-09 | 0.65 | -0.002 | 0.003 | 4.30E-01 |                |               |

|   |          |                 |    |       |      |        |       |          |      |        |       |          |      |        |
|---|----------|-----------------|----|-------|------|--------|-------|----------|------|--------|-------|----------|------|--------|
| 5 | 82911748 | rs492356        | C  | G     | 0.66 | -0.012 | 0.002 | 2.00E-09 | 0.66 | -0.002 | 0.002 | 3.20E-01 | 0.88 | 0.0033 |
| 5 | 82913284 | rs567721        | C  | G     | 0.65 | -0.011 | 0.002 | 4.40E-09 | 0.65 | -0.002 | 0.002 | 4.50E-01 | 0.89 | 0.0023 |
| 5 | 82913361 | rs566799        | G  | A     | 0.66 | -0.012 | 0.002 | 1.80E-09 | 0.66 | -0.002 | 0.002 | 3.40E-01 | 0.89 | 0.0028 |
| 5 | 82913780 | rs651198        | T  | G     | 0.66 | -0.012 | 0.002 | 1.70E-09 | 0.66 | -0.002 | 0.002 | 3.40E-01 | 0.89 | 0.0028 |
| 5 | 82914527 | rs336946        | C  | G     | 0.65 | -0.012 | 0.002 | 3.90E-09 | 0.65 | -0.002 | 0.002 | 4.50E-01 | 0.89 | 0.0022 |
| 5 | 82915184 | rs336943        | C  | T     | 0.65 | -0.012 | 0.002 | 3.90E-09 | 0.65 | -0.002 | 0.002 | 4.50E-01 | 0.89 | 0.0022 |
| 5 | 82915497 | rs336942        | A  | G     | 0.65 | -0.012 | 0.002 | 3.90E-09 | 0.65 | -0.002 | 0.002 | 4.40E-01 | 0.89 | 0.0023 |
| 5 | 82929987 | rs9784716       | C  | A     | 0.67 | -0.012 | 0.002 | 2.00E-09 | 0.67 | -0.003 | 0.002 | 2.70E-01 | 0.88 | 0.0041 |
| 5 | 82932634 | rs12189364      | C  | T     | 0.67 | -0.011 | 0.002 | 1.10E-08 | 0.68 | -0.003 | 0.003 | 1.90E-01 | 0.84 | 0.0117 |
| 5 | 82933835 | rs71709944      | C  | CT    | 0.69 | -0.013 | 0.002 | 1.20E-09 | 0.69 | -0.002 | 0.003 | 3.60E-01 |      |        |
| 5 | 82933913 | rs17206069      | G  | A     | 0.67 | -0.011 | 0.002 | 8.70E-09 | 0.68 | -0.003 | 0.003 | 1.90E-01 | 0.85 | 0.0109 |
| 7 | 35428513 | rs12155459      | A  | T     | 0.77 | -0.007 | 0.002 | 3.30E-03 | 0.77 | -0.015 | 0.003 | 4.20E-08 | 0.84 | 0.0135 |
| 7 | 35429465 | rs11766731      | G  | T     | 0.77 | -0.007 | 0.002 | 2.80E-03 | 0.77 | -0.015 | 0.003 | 3.50E-08 | 0.84 | 0.0137 |
| 7 | 35438831 | rs741408        | T  | C     | 0.23 | 0.007  | 0.002 | 1.70E-03 | 0.23 | 0.016  | 0.003 | 1.20E-08 | 0.84 | 0.0126 |
| 7 | 35440055 | rs2592856       | C  | T     | 0.23 | 0.007  | 0.002 | 1.80E-03 | 0.23 | 0.016  | 0.003 | 6.90E-09 | 0.85 | 0.0099 |
| 7 | 35440155 | rs11762074      | T  | C     | 0.77 | -0.007 | 0.002 | 1.50E-03 | 0.77 | -0.016 | 0.003 | 5.80E-09 | 0.85 | 0.0102 |
| 7 | 35446189 | rs2592855       | T  | C     | 0.23 | 0.007  | 0.002 | 1.30E-03 | 0.23 | 0.016  | 0.003 | 9.70E-09 | 0.84 | 0.0131 |
| 7 | 35449334 | rs998652        | A  | G     | 0.23 | 0.007  | 0.002 | 1.40E-03 | 0.23 | 0.016  | 0.003 | 1.00E-08 | 0.84 | 0.0130 |
| 7 | 35451830 | rs17765314      | G  | A     | 0.77 | -0.007 | 0.002 | 1.40E-03 | 0.77 | -0.016 | 0.003 | 9.10E-09 | 0.84 | 0.0124 |
| 7 | 35451910 | rs2592851       | T  | C     | 0.23 | 0.007  | 0.002 | 1.40E-03 | 0.23 | 0.016  | 0.003 | 9.00E-09 | 0.84 | 0.0124 |
| 7 | 35452092 | rs1362655       | G  | A     | 0.23 | 0.007  | 0.002 | 1.40E-03 | 0.23 | 0.016  | 0.003 | 9.40E-09 | 0.84 | 0.0125 |
| 7 | 35455088 | rs2592850       | T  | A     | 0.32 | 0.007  | 0.002 | 4.50E-04 | 0.32 | 0.014  | 0.003 | 4.60E-08 | 0.77 | 0.0376 |
| 7 | 35456691 | rs2592849       | A  | T     | 0.32 | 0.007  | 0.002 | 4.70E-04 | 0.32 | 0.014  | 0.003 | 4.70E-08 | 0.77 | 0.0372 |
| 7 | 35457954 | 7:35457954_AT_A | AT | A     | 0.32 | 0.007  | 0.002 | 8.40E-04 | 0.32 | 0.014  | 0.003 | 1.60E-08 |      |        |
| 7 | 35458137 | rs140476889     | A  | AAAAC | 0.32 | 0.007  | 0.002 | 4.70E-04 | 0.32 | 0.014  | 0.003 | 3.30E-08 |      |        |
| 7 | 35459888 | rs342977        | G  | A     | 0.23 | 0.007  | 0.002 | 2.40E-03 | 0.23 | 0.016  | 0.003 | 8.10E-09 | 0.85 | 0.0091 |
| 7 | 35460547 | rs342979        | C  | T     | 0.32 | 0.007  | 0.002 | 5.20E-04 | 0.32 | 0.014  | 0.003 | 4.70E-08 | 0.77 | 0.0356 |
| 7 | 35461538 | rs342981        | G  | A     | 0.32 | 0.007  | 0.002 | 4.70E-04 | 0.32 | 0.014  | 0.003 | 4.60E-08 | 0.77 | 0.0367 |
| 7 | 35461715 | rs2551797       | T  | C     | 0.32 | 0.007  | 0.002 | 4.80E-04 | 0.32 | 0.014  | 0.002 | 4.70E-08 | 0.77 | 0.0368 |
| 7 | 35462145 | rs342982        | G  | T     | 0.32 | 0.007  | 0.002 | 4.80E-04 | 0.32 | 0.014  | 0.003 | 4.50E-08 | 0.77 | 0.0363 |

|   |          |                  |     |    |      |        |       |          |             |               |              |                 |      |               |
|---|----------|------------------|-----|----|------|--------|-------|----------|-------------|---------------|--------------|-----------------|------|---------------|
| 7 | 35466464 | rs342986         | G   | A  | 0.23 | 0.007  | 0.002 | 2.30E-03 | <b>0.23</b> | <b>0.016</b>  | <b>0.003</b> | <b>7.90E-09</b> | 0.85 | <b>0.0090</b> |
| 7 | 35466755 | rs342987         | T   | G  | 0.23 | 0.007  | 0.002 | 2.30E-03 | <b>0.23</b> | <b>0.016</b>  | <b>0.003</b> | <b>7.50E-09</b> | 0.85 | <b>0.0089</b> |
| 7 | 35467026 | rs342988         | C   | T  | 0.28 | 0.007  | 0.002 | 7.40E-04 | <b>0.28</b> | <b>0.015</b>  | <b>0.003</b> | <b>6.00E-09</b> | 0.83 | <b>0.0147</b> |
| 7 | 35467677 | 7:35467677_TAA_T | TAA | T  | 0.24 | 0.007  | 0.002 | 1.50E-03 | <b>0.24</b> | <b>0.016</b>  | <b>0.003</b> | <b>1.80E-08</b> |      |               |
| 7 | 35467896 | rs342989         | A   | G  | 0.23 | 0.007  | 0.002 | 2.40E-03 | <b>0.23</b> | <b>0.016</b>  | <b>0.003</b> | <b>7.00E-09</b> | 0.86 | <b>0.0085</b> |
| 7 | 35468763 | rs17697812       | T   | C  | 0.77 | -0.007 | 0.002 | 2.60E-03 | <b>0.77</b> | <b>-0.016</b> | <b>0.003</b> | <b>9.30E-09</b> | 0.85 | <b>0.0091</b> |
| 7 | 35469835 | rs342992         | C   | T  | 0.23 | 0.007  | 0.002 | 2.60E-03 | <b>0.23</b> | <b>0.016</b>  | <b>0.003</b> | <b>9.50E-09</b> | 0.85 | <b>0.0092</b> |
| 7 | 35477175 | rs343000         | C   | T  | 0.23 | 0.007  | 0.002 | 2.40E-03 | <b>0.23</b> | <b>0.016</b>  | <b>0.003</b> | <b>1.10E-08</b> | 0.85 | <b>0.0102</b> |
| 7 | 35478515 | rs343002         | T   | C  | 0.23 | 0.007  | 0.002 | 2.40E-03 | <b>0.23</b> | <b>0.016</b>  | <b>0.003</b> | <b>1.10E-08</b> | 0.85 | <b>0.0102</b> |
| 7 | 35479439 | rs343003         | C   | T  | 0.23 | 0.007  | 0.002 | 2.40E-03 | <b>0.23</b> | <b>0.016</b>  | <b>0.003</b> | <b>1.10E-08</b> | 0.85 | <b>0.0104</b> |
| 7 | 35488349 | rs343011         | T   | G  | 0.23 | 0.007  | 0.002 | 2.30E-03 | <b>0.23</b> | <b>0.016</b>  | <b>0.003</b> | <b>1.10E-08</b> | 0.85 | <b>0.0103</b> |
| 7 | 35496678 | rs343026         | T   | G  | 0.32 | 0.007  | 0.002 | 7.70E-04 | <b>0.32</b> | <b>0.014</b>  | <b>0.003</b> | <b>4.50E-08</b> | 0.79 | <b>0.0296</b> |
| 7 | 35497055 | rs35099106       | C   | CT | 0.23 | 0.007  | 0.002 | 2.50E-03 | <b>0.24</b> | <b>0.016</b>  | <b>0.003</b> | <b>5.20E-09</b> |      |               |
| 7 | 35498200 | rs343029         | A   | G  | 0.23 | 0.007  | 0.002 | 2.20E-03 | <b>0.23</b> | <b>0.016</b>  | <b>0.003</b> | <b>6.60E-09</b> | 0.85 | <b>0.0087</b> |
| 7 | 35500493 | rs343031         | G   | A  | 0.32 | 0.007  | 0.002 | 7.70E-04 | <b>0.32</b> | <b>0.014</b>  | <b>0.003</b> | <b>4.00E-08</b> | 0.79 | <b>0.0283</b> |
| 7 | 35503445 | rs343036         | G   | C  | 0.23 | 0.007  | 0.002 | 2.20E-03 | <b>0.23</b> | <b>0.016</b>  | <b>0.003</b> | <b>6.40E-09</b> | 0.86 | <b>0.0086</b> |
| 7 | 35503600 | rs343037         | G   | T  | 0.23 | 0.007  | 0.002 | 2.20E-03 | <b>0.23</b> | <b>0.016</b>  | <b>0.003</b> | <b>6.50E-09</b> | 0.86 | <b>0.0086</b> |
| 7 | 35503696 | rs343038         | G   | C  | 0.32 | 0.007  | 0.002 | 8.10E-04 | <b>0.32</b> | <b>0.014</b>  | <b>0.003</b> | <b>3.70E-08</b> | 0.80 | <b>0.0271</b> |
| 7 | 35505204 | rs343039         | C   | T  | 0.23 | 0.007  | 0.002 | 2.60E-03 | <b>0.23</b> | <b>0.016</b>  | <b>0.003</b> | <b>5.50E-09</b> | 0.86 | <b>0.0074</b> |
| 8 | 6470650  | rs3020257        | C   | A  | 0.76 | 0.007  | 0.002 | 9.90E-04 | <b>0.76</b> | <b>0.016</b>  | <b>0.003</b> | <b>2.50E-08</b> | 0.82 | <b>0.0187</b> |
| 8 | 6471126  | rs2980664        | G   | A  | 0.76 | 0.008  | 0.002 | 4.80E-04 | <b>0.76</b> | <b>0.015</b>  | <b>0.003</b> | <b>2.70E-08</b> | 0.80 | <b>0.0262</b> |
| 8 | 6472105  | rs2959801        | G   | A  | 0.69 | 0.006  | 0.002 | 1.50E-03 | <b>0.69</b> | <b>0.015</b>  | <b>0.003</b> | <b>2.00E-09</b> | 0.87 | <b>0.0063</b> |
| 8 | 6472603  | rs11137038       | G   | A  | 0.64 | 0.007  | 0.002 | 2.80E-04 | <b>0.64</b> | <b>0.014</b>  | <b>0.002</b> | <b>3.20E-08</b> | 0.76 | <b>0.0402</b> |
| 8 | 6473356  | rs1256           | C   | G  | 0.70 | 0.007  | 0.002 | 3.40E-04 | <b>0.70</b> | <b>0.016</b>  | <b>0.003</b> | <b>4.10E-10</b> | 0.86 | <b>0.0075</b> |
| 8 | 6473758  | rs2454517        | A   | G  | 0.70 | 0.007  | 0.002 | 3.10E-04 | <b>0.70</b> | <b>0.016</b>  | <b>0.003</b> | <b>1.40E-09</b> | 0.84 | <b>0.0121</b> |
| 8 | 6475489  | rs2980662        | G   | C  | 0.68 | 0.007  | 0.002 | 8.80E-04 | <b>0.69</b> | <b>0.014</b>  | <b>0.003</b> | <b>2.40E-08</b> | 0.81 | <b>0.0210</b> |
| 8 | 6476626  | rs7005662        | C   | T  | 0.72 | 0.008  | 0.002 | 1.70E-04 | <b>0.73</b> | <b>0.015</b>  | <b>0.003</b> | <b>8.60E-09</b> | 0.79 | <b>0.0286</b> |
| 8 | 6478481  | rs2253560        | G   | A  | 0.72 | 0.008  | 0.002 | 1.80E-04 | <b>0.73</b> | <b>0.015</b>  | <b>0.003</b> | <b>5.00E-09</b> | 0.80 | <b>0.0239</b> |
| 8 | 6478960  | rs11137040       | C   | G  | 0.70 | 0.007  | 0.002 | 3.40E-04 | <b>0.71</b> | <b>0.014</b>  | <b>0.003</b> | <b>3.30E-08</b> | 0.77 | <b>0.0355</b> |
| 8 | 6479432  | rs2515559        | A   | G  | 0.72 | 0.008  | 0.002 | 2.60E-04 | <b>0.72</b> | <b>0.015</b>  | <b>0.003</b> | <b>2.30E-08</b> | 0.77 | <b>0.0351</b> |

|    |          |                |        |   |      |       |       |          |             |              |              |                 |      |               |
|----|----------|----------------|--------|---|------|-------|-------|----------|-------------|--------------|--------------|-----------------|------|---------------|
| 8  | 6483059  | rs201338894    | ATAAAT | A | 0.72 | 0.008 | 0.002 | 1.10E-04 | <b>0.73</b> | <b>0.016</b> | <b>0.003</b> | <b>2.40E-09</b> |      |               |
| 8  | 6484505  | 8:6484505_CA_C | CA     | C | 0.72 | 0.008 | 0.002 | 6.60E-05 | <b>0.73</b> | <b>0.016</b> | <b>0.003</b> | <b>1.30E-09</b> |      |               |
| 8  | 6484510  | rs2454524      | A      | C | 0.72 | 0.008 | 0.002 | 6.70E-05 | <b>0.73</b> | <b>0.016</b> | <b>0.003</b> | <b>1.30E-09</b> | 0.81 | <b>0.0219</b> |
| 8  | 6484530  | rs2246801      | C      | T | 0.72 | 0.008 | 0.002 | 8.60E-05 | <b>0.72</b> | <b>0.016</b> | <b>0.003</b> | <b>1.10E-09</b> | 0.82 | <b>0.0188</b> |
| 8  | 6484635  | rs2278147      | C      | A | 0.71 | 0.008 | 0.002 | 1.90E-04 | <b>0.71</b> | <b>0.017</b> | <b>0.003</b> | <b>3.00E-11</b> | 0.88 | <b>0.0037</b> |
| 8  | 6484982  | rs2448611      | C      | T | 0.87 | 0.001 | 0.003 | 8.30E-01 | <b>0.70</b> | <b>0.015</b> | <b>0.003</b> | <b>2.70E-08</b> |      |               |
| 8  | 6485295  | rs2912062      | C      | G | 0.70 | 0.008 | 0.002 | 1.60E-04 | <b>0.71</b> | <b>0.017</b> | <b>0.003</b> | <b>3.10E-11</b> | 0.88 | <b>0.0041</b> |
| 8  | 6486033  | rs2912063      | A      | G | 0.71 | 0.008 | 0.002 | 2.20E-04 | <b>0.71</b> | <b>0.017</b> | <b>0.003</b> | <b>2.60E-11</b> | 0.88 | <b>0.0033</b> |
| 8  | 6487449  | rs3020263      | G      | A | 0.72 | 0.008 | 0.002 | 1.00E-04 | <b>0.72</b> | <b>0.016</b> | <b>0.003</b> | <b>7.40E-10</b> | 0.83 | <b>0.0152</b> |
| 8  | 6488577  | rs3020264      | G      | A | 0.72 | 0.008 | 0.002 | 1.10E-04 | <b>0.72</b> | <b>0.016</b> | <b>0.003</b> | <b>1.30E-09</b> | 0.82 | <b>0.0183</b> |
| 8  | 6488787  | rs1974946      | G      | A | 0.72 | 0.008 | 0.002 | 1.10E-04 | <b>0.72</b> | <b>0.016</b> | <b>0.003</b> | <b>1.40E-09</b> | 0.82 | <b>0.0191</b> |
| 8  | 6490200  | rs2433143      | C      | T | 0.73 | 0.008 | 0.002 | 2.80E-04 | <b>0.73</b> | <b>0.015</b> | <b>0.003</b> | <b>1.50E-08</b> | 0.80 | <b>0.0270</b> |
| 8  | 6490544  | 8:6490544_TA_T | TA     | T | 0.70 | 0.007 | 0.002 | 7.00E-04 | <b>0.71</b> | <b>0.016</b> | <b>0.003</b> | <b>1.80E-09</b> |      |               |
| 19 | 45412079 | rs7412         | C      | T | 0.92 | 0.016 | 0.003 | 4.40E-06 | <b>0.92</b> | <b>0.027</b> | <b>0.004</b> | <b>4.40E-10</b> | 0.75 | <b>0.0458</b> |
| 19 | 45413233 | rs1065853      | G      | T | 0.92 | 0.016 | 0.003 | 4.00E-06 | <b>0.92</b> | <b>0.027</b> | <b>0.004</b> | <b>4.00E-10</b> | 0.75 | <b>0.0468</b> |

Where: Insertion-deletion SNPs are not included due to software limitations.

Supplemental Table V: Genetic correlations with IMTmean by sex

|                            | men   |      |       |          |                 | women |      |       |          |                 |
|----------------------------|-------|------|-------|----------|-----------------|-------|------|-------|----------|-----------------|
|                            | rg    | se   | z     | p        | FDR-P           | rg    | se   | z     | p        | FDR-P           |
| CHARGE IMTmean 2011        | 0.88  | 0.11 | 7.87  | 3.57E-15 | <b>9.63E-14</b> | 0.71  | 0.10 | 7.45  | 9.14E-14 | <b>2.47E-12</b> |
| CHARGE IMTmean 2018        | 0.86  | 0.12 | 6.88  | 6.06E-12 | <b>8.18E-11</b> | 0.70  | 0.10 | 6.87  | 6.48E-12 | <b>8.75E-11</b> |
| BMI                        | 0.18  | 0.05 | 3.66  | 2.48E-04 | <b>2.24E-03</b> | 0.21  | 0.09 | 2.47  | 1.35E-02 | 9.14E-02        |
| BMI men only               | 0.16  | 0.05 | 2.97  | 3.00E-03 | <b>2.03E-02</b> |       |      |       |          |                 |
| BMI women only             |       |      |       |          |                 | 0.13  | 0.05 | 2.54  | 0.01     | 9.99E-02        |
| Fasting Insulin            | 0.31  | 0.11 | 2.71  | 6.70E-03 | <b>3.02E-02</b> | 0.23  | 0.10 | 2.36  | 1.84E-02 | 8.27E-02        |
| Fasting Insulin men only   | 0.13  | 0.20 | 0.63  | 5.30E-01 | 7.95E-01        |       |      |       |          |                 |
| Fasting Insulin women only |       |      |       |          |                 | 0.15  | 0.15 | 0.97  | 0.33     | 5.97E-01        |
| Fasting Glucose            | 0.23  | 0.09 | 2.74  | 6.22E-03 | <b>3.36E-02</b> | -0.12 | 0.05 | -2.36 | 1.84E-02 | 9.91E-02        |
| Fasting Glucose men only   | 0.00  | 0.15 | -0.03 | 9.75E-01 | 9.75E-01        |       |      |       |          |                 |
| Fasting Glucose women only |       |      |       |          |                 | -0.06 | 0.13 | -0.49 | 0.63     | 8.46E-01        |
| Type 2 Diabetes            | 0.26  | 0.11 | 2.45  | 1.42E-02 | 5.50E-02        | 0.10  | 0.05 | 2.11  | 3.52E-02 | 1.36E-01        |
| Rheumatoid arthritis       | 0.21  | 0.09 | 2.33  | 1.96E-02 | 6.60E-02        | 0.18  | 0.10 | 1.74  | 8.23E-02 | 2.78E-01        |
| Ever Smoker                | 0.19  | 0.10 | 1.97  | 4.87E-02 | 1.46E-01        | -0.10 | 0.07 | -1.52 | 1.29E-01 | 3.48E-01        |
| WHRadjBMI                  | 0.12  | 0.07 | 1.75  | 8.08E-02 | 2.18E-01        | 0.03  | 0.02 | 1.36  | 1.74E-01 | 4.26E-01        |
| WHRadjBMI men only         | 0.01  | 0.09 | 0.06  | 9.54E-01 | 1.03E+00        |       |      |       |          |                 |
| WHRadjBMI women only       |       |      |       |          |                 | 0.10  | 0.07 | 1.54  | 0.12     | 3.68E-01        |
| Smoking onset              | -0.36 | 0.22 | -1.63 | 1.03E-01 | 2.53E-01        | 0.08  | 0.06 | 1.24  | 2.14E-01 | 4.82E-01        |
| Fasting Proinsulin         | 0.28  | 0.18 | 1.57  | 1.18E-01 | 2.65E-01        | 0.03  | 0.02 | 1.06  | 2.88E-01 | 5.98E-01        |
| HDL                        | -0.06 | 0.04 | -1.28 | 2.00E-01 | 4.15E-01        | -0.09 | 0.09 | -1.04 | 3.00E-01 | 5.78E-01        |
| Fasting Insulin adjBMI     | 0.10  | 0.11 | 0.90  | 3.69E-01 | 7.12E-01        | -0.05 | 0.06 | -0.86 | 3.89E-01 | 6.56E-01        |
| Triglycerides              | 0.04  | 0.06 | 0.69  | 4.88E-01 | 7.76E-01        | 0.07  | 0.13 | 0.53  | 5.95E-01 | 8.46E-01        |
| 2hr Glucose                | -0.10 | 0.14 | -0.72 | 4.72E-01 | 7.97E-01        | 0.07  | 0.13 | 0.55  | 5.81E-01 | 8.71E-01        |
| Ulcerative Collitis        | -0.08 | 0.10 | -0.75 | 4.56E-01 | 8.21E-01        | 0.03  | 0.05 | 0.59  | 5.56E-01 | 8.82E-01        |
| Cholesterol                | -0.02 | 0.07 | -0.27 | 7.86E-01 | 9.23E-01        | 0.04  | 0.10 | 0.40  | 6.87E-01 | 7.42E-01        |
| LDL                        | 0.02  | 0.06 | 0.30  | 7.66E-01 | 9.41E-01        | -0.12 | 0.27 | -0.43 | 6.67E-01 | 7.50E-01        |

|                          |       |      |       |          |          |       |      |       |          |          |
|--------------------------|-------|------|-------|----------|----------|-------|------|-------|----------|----------|
| Cigarettes per day       | 0.05  | 0.14 | 0.33  | 7.38E-01 | 9.49E-01 | -0.03 | 0.07 | -0.45 | 6.52E-01 | 7.65E-01 |
| DBP                      | 0.01  | 0.03 | 0.38  | 7.06E-01 | 9.53E-01 | 0.07  | 0.16 | 0.46  | 6.46E-01 | 7.92E-01 |
| Irritable Bowel Disorder | -0.03 | 0.08 | -0.41 | 6.85E-01 | 9.74E-01 | -0.04 | 0.09 | -0.49 | 6.28E-01 | 8.07E-01 |
| Cardiovascular disease   | -0.05 | 0.30 | -0.16 | 8.72E-01 | 9.81E-01 | -0.02 | 0.08 | -0.26 | 7.96E-01 | 8.27E-01 |
| SBP                      | 0.00  | 0.03 | -0.05 | 9.56E-01 | 9.93E-01 | -0.01 | 0.17 | -0.04 | 9.69E-01 | 9.69E-01 |

---

Supplemental Table VI: Previous associations with SNPs in GWAS-significant loci

| Chr | BP        | SNP         | RA | RAF  | OR   | Beta                 | P-value               | Mapped gene                   | P-value annotation                                     | A1 | IMTmean Beta | IMTmean P | direction  | PMID     |
|-----|-----------|-------------|----|------|------|----------------------|-----------------------|-------------------------------|--------------------------------------------------------|----|--------------|-----------|------------|----------|
| 5   | 81696676  | rs446064    |    |      |      |                      | 9 x 10 <sup>-29</sup> | <i>SSBP2</i>                  | Adolescent idiopathic scoliosis                        |    |              |           |            | 30019117 |
| 7   | 35428286  | rs342989    | A  | 0.23 |      | 0.1631 mmHg increase | 3 x 10 <sup>-15</sup> | <i>AC007652.1, AC009531.1</i> | Diastolic blood pressure                               | A  | 0.01         | 3.6E-11   | consistent | 30224653 |
| 7   | 35435712  | rs2541918   | T  | 0.68 |      | 0.1567 unit decrease | 8 x 10 <sup>-7</sup>  | <i>AC007652.1, AC009531.1</i> | Diastolic blood pressure                               | A  | 0.01         | 8.7E-08   | consistent | 28135244 |
| 7   | 35506177  | rs11763856  | T  | 0.03 |      | 3.1 ms increase      | 4 x 10 <sup>-10</sup> | <i>AC007652.1</i>             | PR interval                                            | C  | -0.02        | 0.00022   |            | 30046033 |
| 7   | 35506177  | rs11763856  | T  | 0.04 |      | 3.055 unit increase  | 1 x 10 <sup>-8</sup>  | <i>AC007652.1</i>             | PR interval                                            | C  | -0.02        | 0.00022   |            | 30679814 |
| 7   | 35515178  | rs343064    | A  | 0.40 |      | 1.31 unit increase   | 3 x 10 <sup>-8</sup>  | <i>HERPUD2, AC007652.1</i>    | Non-alcoholic fatty liver disease histology (Fibrosis) | C  | 0.00         | 0.96      |            | 20708005 |
| 8   | 6493731   | rs17077154  | G  | 0.07 |      | 0.302 unit increase  | 8 x 10 <sup>-6</sup>  | <i>MCPH1</i>                  | Cytomegalovirus antibody response                      |    |              |           |            | 21993531 |
| 8   | 6494184   | rs141416541 | T  | 0.03 |      | 0.4511 unit decrease | 4 x 10 <sup>-7</sup>  | <i>MCPH1</i>                  | Diastolic blood pressure                               | C  | 0.01         | 0.0019    | consistent | 28135244 |
| 10  | 30167199  | rs2779071   |    |      |      |                      | 2 x 10 <sup>-11</sup> | <i>RNUG-598P, JCAD</i>        |                                                        | T  | 0.00         | 5.40E-01  |            | 30595370 |
| 11  | 103718366 | rs1917445   |    |      |      |                      | 6 x 10 <sup>-7</sup>  | <i>AP002989.1</i>             | Neutrophil count                                       | C  | 0.01         | 2.6E-06   |            | 21507922 |
| 11  | 103789839 | rs974819    | T  | 0.32 | 1.07 |                      | 2 x 10 <sup>-9</sup>  | <i>AP002989.1</i>             | Coronary heart disease                                 | T  | 0.01         | 5.6E-10   | consistent | 21378988 |
| 11  | 103789839 | rs974819    | T  | 0.31 |      | 0.0614 unit increase | 1 x 10 <sup>-28</sup> | <i>AP002989.1</i>             | Coronary artery disease                                | T  | 0.01         | 5.6E-10   | consistent | 29212778 |

|    |           |            |   |      |      |                      |           |                           |                                            |   |       |         |            |          |
|----|-----------|------------|---|------|------|----------------------|-----------|---------------------------|--------------------------------------------|---|-------|---------|------------|----------|
| 11 | 103789839 | rs974819   | T | 0.31 |      | 0.0674 unit increase | 6 x 10-29 | AP002989.1                | Coronary artery disease                    | T | 0.01  | 5.6E-10 | consistent | 29212778 |
| 11 | 103798234 | rs2019090  | A | 0.36 | 1.07 |                      | 4 x 10-9  | AP002989.1                | Myocardial infarction                      | A | 0.01  | 3.7E-10 | consistent | 26343387 |
| 13 | 110397276 | rs9515203  | T | 0.74 |      | 0.068 unit increase  | 6 x 10-24 | COL4A2                    | Coronary artery disease                    | T | -0.01 | 1.1E-08 | consistent | 29212778 |
| 13 | 110397276 | rs9515203  | T | 0.74 |      | 0.0596 unit increase | 4 x 10-23 | COL4A2                    | Coronary artery disease                    | T | -0.01 | 1.1E-08 | consistent | 29212778 |
| 13 | 110397276 | rs9515203  | T | 0.74 |      | 0.0675 unit increase | 6 x 10-24 | COL4A2                    | Coronary artery disease                    | T | -0.01 | 1.1E-08 | consistent | 29212778 |
| 19 | 41319286  | rs73045269 | T | 0.15 |      | 0.07 unit increase   | 1 x 10-14 | CCDC97, TGFB1             | Coronary artery disease                    | C | 0.00  | 0.99    |            | 29212778 |
| 19 | 41326326  | rs12980942 | A | 0.16 |      | 0.0609 unit decrease | 7 x 10-15 | TGFB1                     | Coronary artery disease                    | G | 0.00  | 0.29    |            | 29212778 |
| 19 | 41345604  | rs4803455  | A | 0.49 |      | 0.054 unit decrease  | 4 x 10-17 | TGFB1                     | Coronary artery disease                    | C | 0.00  | 0.19    |            | 29212778 |
| 19 | 41345604  | rs4803455  | A | 0.50 |      | 0.0484 unit decrease | 2 x 10-17 | TGFB1                     | Coronary artery disease                    | C | 0.00  | 0.19    |            | 29212778 |
| 19 | 41345604  | rs4803455  | A | 0.50 |      | 0.1617 mmHg decrease | 8 x 10-11 | TGFB1                     | Pulse pressure                             | C | 0.00  | 0.19    |            | 30578418 |
| 19 | 41346870  | rs2288874  | T | 0.42 |      | 0.0531 unit increase | 4 x 10-16 | TGFB1                     | Coronary artery disease                    | T | 0.00  | 0.11    |            | 29212778 |
| 19 | 41348629  | rs8108632  | T | 0.48 | 1.05 |                      | 4 x 10-8  | TGFB1                     | Coronary artery disease (broad definition) | T | 0.00  | 0.2     |            | 28714975 |
| 19 | 41353016  | rs1800470  | A | 0.62 |      | 0.259 unit increase  | 5 x 10-26 | TGFB1, AC011462.1, TMEM91 | Blood protein levels (TGFB1)               | G | 0.00  | 0.33    |            | 30072576 |



|    |          |           |   |      |                           |                        |                                 |                                                        |   |      |         |            |          |
|----|----------|-----------|---|------|---------------------------|------------------------|---------------------------------|--------------------------------------------------------|---|------|---------|------------|----------|
| 19 | 41355454 | rs4803457 | T |      | 0.149 unit increase       | 2 x 10 <sup>-8</sup>   | <i>B9D2, TMEM91, AC011462.1</i> | Pulse pressure                                         | T | 0.00 | 0.32    |            | 30595370 |
| 19 | 44908822 | rs7412    |   |      | 0.75 unit decrease        | 3 x 10 <sup>-58</sup>  | <i>APOE</i>                     | Lipid metabolism phenotypes (L-LDL-FC)                 | C | 0.02 | 2.1E-15 |            | 22286219 |
| 19 | 44908822 | rs7412    |   |      | 6.2 mg/dL decrease        | 2 x 10 <sup>-47</sup>  | <i>APOE</i>                     | Response to statins (baseline LDL-C)                   | C | 0.02 | 2.1E-15 |            | 22331829 |
| 19 | 44908822 | rs7412    |   | 0.10 | 12.3 mg/dL decrease       | 2 x 10 <sup>-9</sup>   | <i>APOE</i>                     | LDL cholesterol                                        | C | 0.02 | 2.1E-15 |            | 23067351 |
| 19 | 44908822 | rs7412    | T | 0.12 | 0.48 unit decrease        | 3 x 10 <sup>-53</sup>  | <i>APOE</i>                     | Lipid traits (LDL-C)                                   | C | 0.02 | 2.1E-15 | consistent | 24023260 |
| 19 | 44908822 | rs7412    | T | 0.12 | 0.09 unit decrease        | 2 x 10 <sup>-30</sup>  | <i>APOE</i>                     | Lipid traits (TC)                                      | C | 0.02 | 2.1E-15 | consistent | 24023260 |
| 19 | 44908822 | rs7412    | C | 0.93 | 0.413 s.d. increase       | 8 x 10 <sup>-239</sup> | <i>APOE</i>                     | Cholesterol, total                                     | C | 0.02 | 2.1E-15 | consistent | 25961943 |
| 19 | 44908822 | rs7412    |   |      |                           | 9 x 10 <sup>-16</sup>  | <i>APOE</i>                     | Ideal cardiovascular health (clinical and behavioural) | C | 0.02 | 2.1E-15 |            | 27179730 |
| 19 | 44908822 | rs7412    | T | 0.06 | 0.59 unit decrease        | 2 x 10 <sup>-120</sup> | <i>APOE</i>                     | Metabolite levels (Free cholesterol in large LDL)      | C | 0.02 | 2.1E-15 | consistent | 27005778 |
| 19 | 44908822 | rs7412    | T | 0.08 | 0.1564597 mg/dl increase  | 6 x 10 <sup>-14</sup>  | <i>APOE</i>                     | HDL cholesterol                                        | C | 0.02 | 2.1E-15 | consistent | 28270201 |
| 19 | 44908822 | rs7412    | T | 0.08 | 0.41957754 mg/dl decrease | 5 x 10 <sup>-94</sup>  | <i>APOE</i>                     | Cholesterol, total                                     | C | 0.02 | 2.1E-15 | consistent | 28270201 |

|    |          |        |   |      |                       |                        |             |                                                               |   |      |         |            |          |
|----|----------|--------|---|------|-----------------------|------------------------|-------------|---------------------------------------------------------------|---|------|---------|------------|----------|
| 19 | 44908822 | rs7412 | T | 0.07 | 0.59 unit decrease    | 2 x 10 <sup>-286</sup> | <i>APOE</i> | LDL cholesterol levels (Trans-ethnic initial)                 | C | 0.02 | 2.1E-15 | consistent | 28334899 |
| 19 | 44908822 | rs7412 | T | 0.07 | 0.374 unit decrease   | 8 x 10 <sup>-315</sup> | <i>APOE</i> | Total cholesterol levels (Trans-ethnic initial)               | C | 0.02 | 2.1E-15 | consistent | 28334899 |
| 19 | 44908822 | rs7412 | T |      | 0.313 mmol/L decrease | 7 x 10 <sup>-15</sup>  | <i>APOE</i> | LDL cholesterol levels                                        | C | 0.02 | 2.1E-15 | consistent | 28371326 |
| 19 | 44908822 | rs7412 | T | 0.08 | 0.3826 unit decrease  | 4 x 10 <sup>-10</sup>  | <i>APOE</i> | Pulse pressure                                                | C | 0.02 | 2.1E-15 | consistent | 28135244 |
| 19 | 44908822 | rs7412 | T |      | 3.34 mg/dL decrease   | 3 x 10 <sup>-10</sup>  | <i>APOE</i> | Lipoprotein (a) levels                                        | C | 0.02 | 2.1E-15 |            | 28512139 |
| 19 | 44908822 | rs7412 | T |      | 2.78 unit decrease    | 3 x 10 <sup>-9</sup>   | <i>APOE</i> | Lipoprotein(a) levels adjusted for apolipoprotein(a) isoforms | C | 0.02 | 2.1E-15 | consistent | 28512139 |
| 19 | 44908822 | rs7412 | T | 0.08 | 0.419 unit decrease   | 3 x 10 <sup>-19</sup>  | <i>APOE</i> | Low density lipoprotein cholesterol levels                    | C | 0.02 | 2.1E-15 | consistent | 28548082 |
| 19 | 44908822 | rs7412 | T | 0.08 | 0.27 unit decrease    | 1 x 10 <sup>-8</sup>   | <i>APOE</i> | Total cholesterol levels                                      | C | 0.02 | 2.1E-15 | consistent | 28548082 |
| 19 | 44908822 | rs7412 |   |      | 11.96 unit increase   | 9 x 10 <sup>-19</sup>  | <i>APOE</i> | Cardiovascular risk factors (LDL-cholesterol)                 | C | 0.02 | 2.1E-15 |            | 20838585 |
| 19 | 44908822 | rs7412 | C | 0.92 | 1.15                  | 2 x 10 <sup>-19</sup>  | <i>APOE</i> | Coronary artery disease (broad definition)                    | C | 0.02 | 2.1E-15 | consistent | 28714975 |

|    |          |        |   |      |                                    |                        |             |                                                                                                                                                   |   |      |         |            |          |
|----|----------|--------|---|------|------------------------------------|------------------------|-------------|---------------------------------------------------------------------------------------------------------------------------------------------------|---|------|---------|------------|----------|
| 19 | 44908822 | rs7412 | T | 0.06 | 17.11<br>(nmol/min/ml)<br>decrease | 8 x 10 <sup>-78</sup>  | <i>APOE</i> | Lipoprotein<br>phospholipase<br>A2 activity in<br>cardiovascular<br>disease                                                                       | C | 0.02 | 2.1E-15 | consistent | 28753643 |
| 19 | 44908822 | rs7412 | T | 0.06 | 0.04 unit<br>decrease              | 2 x 10 <sup>-27</sup>  | <i>APOE</i> | Lipoprotein-<br>associated<br>phospholipase<br>A2 activity<br>change in<br>response to<br>darapladib<br>treatment in<br>cardiovascular<br>disease | C | 0.02 | 2.1E-15 | consistent | 28753643 |
| 19 | 44908822 | rs7412 | T | 0.08 | 0.16 unit<br>decrease              | 3 x 10 <sup>-39</sup>  | <i>APOE</i> | Coronary artery<br>disease                                                                                                                        | C | 0.02 | 2.1E-15 | consistent | 29212778 |
| 19 | 44908822 | rs7412 | T | 0.08 | 0.1368 unit<br>decrease            | 2 x 10 <sup>-35</sup>  | <i>APOE</i> | Coronary artery<br>disease                                                                                                                        | C | 0.02 | 2.1E-15 | consistent | 29212778 |
| 19 | 44908822 | rs7412 | T | 0.08 | 0.1603 unit<br>decrease            | 3 x 10 <sup>-39</sup>  | <i>APOE</i> | Coronary artery<br>disease                                                                                                                        | C | 0.02 | 2.1E-15 | consistent | 29212778 |
| 19 | 44908822 | rs7412 |   | 2.31 |                                    | 3 x 10 <sup>-105</sup> | <i>APOE</i> | Alzheimer's<br>disease (late<br>onset)                                                                                                            | C | 0.02 | 2.1E-15 |            | 28714976 |
| 19 | 44908822 | rs7412 |   |      |                                    | 9 x 10 <sup>-62</sup>  | <i>APOE</i> | Family history of<br>Alzheimer's<br>disease                                                                                                       | C | 0.02 | 2.1E-15 |            | 29777097 |
| 19 | 44908822 | rs7412 |   |      |                                    | 2 x 10 <sup>-76</sup>  | <i>APOE</i> | Alzheimer's<br>disease or family<br>history of<br>Alzheimer's<br>disease                                                                          | C | 0.02 | 2.1E-15 |            | 29777097 |

|    |          |        |   |      |                      |                        |             |                                                       |   |      |         |            |          |
|----|----------|--------|---|------|----------------------|------------------------|-------------|-------------------------------------------------------|---|------|---------|------------|----------|
| 19 | 44908822 | rs7412 | C | 0.94 | 0.795 unit increase  | 3 x 10 <sup>-56</sup>  | <i>APOE</i> | Blood protein levels (APOE)                           | C | 0.02 | 2.1E-15 | consistent | 30072576 |
| 19 | 44908822 | rs7412 |   | 0.08 | 0.3753 unit decrease | 5 x 10 <sup>-31</sup>  | <i>APOE</i> | Pulse pressure                                        | C | 0.02 | 2.1E-15 |            | 30224653 |
| 19 | 44908822 | rs7412 |   |      |                      | 3 x 10 <sup>-63</sup>  | <i>APOE</i> | Cardiovascular disease                                | C | 0.02 | 2.1E-15 |            | 30595370 |
| 19 | 44908822 | rs7412 |   |      |                      | 4 x 10 <sup>-21</sup>  | <i>APOE</i> | Systolic blood pressure                               | C | 0.02 | 2.1E-15 |            | 30595370 |
| 19 | 44908822 | rs7412 | C | 0.92 | 0.079 unit decrease  | 5 x 10 <sup>-29</sup>  | <i>APOE</i> | High density lipoprotein cholesterol levels           | C | 0.02 | 2.1E-15 | consistent | 29507422 |
| 19 | 44908822 | rs7412 | C | 0.95 | 0.152 unit decrease  | 2 x 10 <sup>-7</sup>   | <i>APOE</i> | High density lipoprotein cholesterol levels           | C | 0.02 | 2.1E-15 | consistent | 29507422 |
| 19 | 44908822 | rs7412 | C |      | 0.085 unit decrease  | 2 x 10 <sup>-36</sup>  | <i>APOE</i> | High density lipoprotein cholesterol levels           | C | 0.02 | 2.1E-15 | consistent | 29507422 |
| 19 | 44908822 | rs7412 | C | 0.92 | 0.493 unit increase  | 1 x 10 <sup>-300</sup> | <i>APOE</i> | Low density lipoprotein cholesterol levels (EA)       | C | 0.02 | 2.1E-15 | consistent | 29507422 |
| 19 | 44908822 | rs7412 | C | 0.95 | 0.574 unit increase  | 9 x 10 <sup>-59</sup>  | <i>APOE</i> | Low density lipoprotein cholesterol levels (Hispanic) | C | 0.02 | 2.1E-15 | consistent | 29507422 |
| 19 | 44908822 | rs7412 | C | 0.89 | 0.522 unit increase  | 2 x 10 <sup>-36</sup>  | <i>APOE</i> | Low density lipoprotein cholesterol levels (AA)       | C | 0.02 | 2.1E-15 | consistent | 29507422 |

|    |          |        |   |      |                           |                        |             |                                                              |   |      |         |                     |          |
|----|----------|--------|---|------|---------------------------|------------------------|-------------|--------------------------------------------------------------|---|------|---------|---------------------|----------|
| 19 | 44908822 | rs7412 | C |      | 0.498 unit increase       | 1 x 10 <sup>-300</sup> | <i>APOE</i> | Low density lipoprotein cholesterol levels                   | C | 0.02 | 2.1E-15 | consistent          | 29507422 |
| 19 | 44908822 | rs7412 | C | 0.92 | 0.09 unit decrease        | 5 x 10 <sup>-31</sup>  | <i>APOE</i> | Triglycerides (EA)                                           | C | 0.02 | 2.1E-15 | <b>inconsistent</b> | 29507422 |
| 19 | 44908822 | rs7412 | C |      | 0.087 unit decrease       | 2 x 10 <sup>-32</sup>  | <i>APOE</i> | Triglycerides                                                | C | 0.02 | 2.1E-15 | <b>inconsistent</b> | 29507422 |
| 19 | 44908822 | rs7412 | C | 0.92 | 0.342 unit increase       | 1 x 10 <sup>-300</sup> | <i>APOE</i> | Total cholesterol levels (EA)                                | C | 0.02 | 2.1E-15 | consistent          | 29507422 |
| 19 | 44908822 | rs7412 | C | 0.95 | 0.411 unit increase       | 3 x 10 <sup>-31</sup>  | <i>APOE</i> | Total cholesterol levels (Hispanic)                          | C | 0.02 | 2.1E-15 | consistent          | 29507422 |
| 19 | 44908822 | rs7412 | C | 0.89 | 0.381 unit increase       | 3 x 10 <sup>-20</sup>  | <i>APOE</i> | Total cholesterol levels (AA)                                | C | 0.02 | 2.1E-15 | consistent          | 29507422 |
| 19 | 44908822 | rs7412 | C |      | 0.348 unit increase       | 1 x 10 <sup>-300</sup> | <i>APOE</i> | Total cholesterol levels                                     | C | 0.02 | 2.1E-15 | consistent          | 29507422 |
| 19 | 44908822 | rs7412 | T | 0.08 | 0.3255 mmHg decrease      | 2 x 10 <sup>-11</sup>  | <i>APOE</i> | Systolic blood pressure                                      | C | 0.02 | 2.1E-15 | consistent          | 30578418 |
| 19 | 44908822 | rs7412 | T | 0.08 | 0.3606 mmHg decrease      | 4 x 10 <sup>-24</sup>  | <i>APOE</i> | Pulse pressure                                               | C | 0.02 | 2.1E-15 | consistent          | 30578418 |
| 19 | 44908822 | rs7412 | T | 0.08 | 21.199877 z-unit decrease | 1 x 10 <sup>-99</sup>  | <i>APOE</i> | Alzheimer's disease or family history of Alzheimer's disease | C | 0.02 | 2.1E-15 |                     | 30617256 |
| 19 | 44908822 | rs7412 | T | 0.08 | 0.0119 unit decrease      | 1 x 10 <sup>-14</sup>  | <i>APOE</i> | Carotid intima media thickness                               | C | 0.02 | 2.1E-15 | consistent          | 30510157 |
| 19 | 44908822 | rs7412 | C | 0.93 | 2.07                      | 1 x 10 <sup>-7</sup>   | <i>APOE</i> | Alzheimer's disease (females)                                | C | 0.02 | 2.1E-15 |                     | 30636644 |
| 19 | 44908822 | rs7412 | C | 0.93 | 2.21                      | 4 x 10 <sup>-13</sup>  | <i>APOE</i> | Alzheimer's disease                                          | C | 0.02 | 2.1E-15 |                     | 30636644 |

|    |          |           |   |      |                          |                        |            |                                                  |   |      |         |            |          |
|----|----------|-----------|---|------|--------------------------|------------------------|------------|--------------------------------------------------|---|------|---------|------------|----------|
| 19 | 44909976 | rs1065853 | G | 0.93 | 0.603 s.d.<br>increase   | 5 x 10 <sup>-324</sup> | AC011481.3 | LDL cholesterol                                  | G | 0.02 | 1.6E-15 | consistent | 25961943 |
| 19 | 44909976 | rs1065853 |   |      | 0.573 unit<br>decrease   | 5 x 10 <sup>-50</sup>  | AC011481.3 | Total cholesterol<br>levels in LDL               | G | 0.02 | 1.6E-15 |            | 29084231 |
| 19 | 44909976 | rs1065853 |   |      | 0.399 unit<br>decrease   | 4 x 10 <sup>-25</sup>  | AC011481.3 | Serum total<br>cholesterol levels                | G | 0.02 | 1.6E-15 |            | 29084231 |
| 19 | 44909976 | rs1065853 |   |      | 0.642 unit<br>decrease   | 1 x 10 <sup>-62</sup>  | AC011481.3 | Free cholesterol<br>levels in large<br>LDL       | G | 0.02 | 1.6E-15 |            | 29084231 |
| 19 | 44909976 | rs1065853 | T | 0.08 | 0.72 unit<br>decrease    | 2 x 10 <sup>-58</sup>  | AC011481.3 | Blood protein<br>levels ((isoform<br>E3), APOE)  | G | 0.02 | 1.6E-15 | consistent | 29875488 |
| 19 | 44909976 | rs1065853 | T | 0.06 | 13.1251 unit<br>decrease | 2 x 10 <sup>-26</sup>  | AC011481.3 | Total cholesterol<br>levels                      | G | 0.02 | 1.6E-15 | consistent | 30718733 |
| 19 | 44909976 | rs1065853 | T |      | 0.1615 unit<br>decrease  | 3 x 10 <sup>-54</sup>  | AC011481.3 | Low density<br>lipoprotein<br>cholesterol levels | G | 0.02 | 1.6E-15 | consistent | 30718733 |

---

Supplemental Table VII: Predicted functional, coding or loss of function variants

| #Uploaded_variation | chr | pos      | Allele | Consequence        | IMPACT   | SYMBOL              | SIFT                           | PolyPhen             |
|---------------------|-----|----------|--------|--------------------|----------|---------------------|--------------------------------|----------------------|
| rs6658335           | 1   | 1707555  | T      | missense_variant   | MODERATE | <i>CDK11A</i>       | tolerated_low_confidence(0.06) | benign(0.007)        |
| rs2912010           | 8   | 6621465  | T      | synonymous_variant | LOW      | <i>MCPH1</i>        | -                              | -                    |
| rs1057090           | 8   | 6621521  | A      | missense_variant   | MODERATE | <i>MCPH1</i>        | tolerated(0.08)                | benign(0.129)        |
| rs1057090           | 8   | 6621521  | G      | missense_variant   | MODERATE | <i>MCPH1</i>        | deleterious(0.02)              | benign(0.025)        |
| rs1057090           | 8   | 6621521  | T      | missense_variant   | MODERATE | <i>MCPH1</i>        | tolerated(1)                   | benign(0)            |
| rs2912016           | 8   | 6621657  | A      | synonymous_variant | LOW      | <i>MCPH1</i>        | -                              | -                    |
| rs2912057           | 8   | 6625961  | G      | missense_variant   | MODERATE | <i>MCPH1</i>        | -                              | -                    |
| rs2912057           | 8   | 6625961  | G      | missense_variant   | MODERATE | <i>MCPH1</i>        | -                              | -                    |
| rs11558719          | 10  | 72213199 | T      | missense_variant   | MODERATE | <i>ASCC1</i>        | tolerated(0.21)                | benign(0.203)        |
| rs28375406          | 16  | 88930433 | G      | missense_variant   | MODERATE | <i>LOC105371409</i> | -                              | -                    |
| rs12924185          | 16  | 88950476 | T      | missense_variant   | MODERATE | <i>LOC100129697</i> | tolerated_low_confidence(0.07) | unknown(0)           |
| rs1160983           | 19  | 44893972 | A      | synonymous_variant | LOW      | <i>TOMM40</i>       | -                              | -                    |
| rs7412              | 19  | 44908822 | T      | missense_variant   | MODERATE | <i>APOE</i>         | deleterious(0)                 | probably_damaging(1) |

Supplemental Table VIII: EQTLs identified in GTEx

|      | SNP Id    | Chr | Pos      | A1 | Gene Symbol      | Gencode Id        | P-Value  | NES   | Tissue                                    |
|------|-----------|-----|----------|----|------------------|-------------------|----------|-------|-------------------------------------------|
| lead | rs309563  | 5   | 82896644 | A  | <i>VCAN-AS1</i>  | ENSG00000249835.2 | 4.60E-06 | -0.2  | Testis                                    |
| VEP  | rs1057090 | 8   | 6479042  | C  | <i>MCPH1-AS1</i> | ENSG00000271743.1 | 5.20E-06 | -0.44 | Testis                                    |
| VEP  | rs1057090 | 8   | 6479042  | C  | <i>MCPH1-AS1</i> | ENSG00000271743.1 | 2.70E-05 | -0.26 | Thyroid                                   |
| VEP  | rs2912010 | 8   | 6478986  | C  | <i>MCPH1-AS1</i> | ENSG00000271743.1 | 8.30E-06 | -0.28 | Nerve - Tibial                            |
| VEP  | rs2912010 | 8   | 6478986  | C  | <i>MCPH1-AS1</i> | ENSG00000271743.1 | 8.00E-06 | -0.43 | Testis                                    |
| VEP  | rs2912016 | 8   | 6479178  | C  | <i>MCPH1-AS1</i> | ENSG00000271743.1 | 3.90E-06 | -0.37 | Colon - Transverse                        |
| VEP  | rs2912016 | 8   | 6479178  | C  | <i>MCPH1-AS1</i> | ENSG00000271743.1 | 1.30E-05 | -0.3  | Esophagus - Muscularis                    |
| VEP  | rs2912016 | 8   | 6479178  | C  | <i>MCPH1-AS1</i> | ENSG00000271743.1 | 4.30E-09 | -0.37 | Nerve - Tibial                            |
| VEP  | rs2912016 | 8   | 6479178  | C  | <i>MCPH1-AS1</i> | ENSG00000271743.1 | 3.10E-06 | -0.58 | Prostate                                  |
| VEP  | rs2912016 | 8   | 6479178  | C  | <i>MCPH1-AS1</i> | ENSG00000271743.1 | 3.90E-06 | -0.46 | Stomach                                   |
| VEP  | rs2912016 | 8   | 6479178  | C  | <i>MCPH1-AS1</i> | ENSG00000271743.1 | 2.80E-06 | -0.47 | Testis                                    |
| VEP  | rs2912016 | 8   | 6479178  | C  | <i>MCPH1-AS1</i> | ENSG00000271743.1 | 1.00E-07 | -0.33 | Thyroid                                   |
| VEP  | rs2912057 | 8   | 6483482  | C  | <i>MCPH1-AS1</i> | ENSG00000271743.1 | 2.30E-05 | -0.26 | Nerve - Tibial                            |
| lead | rs2912062 | 8   | 6485295  | C  | <i>MCPH1-AS1</i> | ENSG00000271743.1 | 3.10E-06 | -0.52 | Brain - Cortex                            |
| lead | rs2912062 | 8   | 6485295  | C  | <i>MCPH1-AS1</i> | ENSG00000271743.1 | 7.70E-07 | -0.46 | Brain - Nucleus accumbens (basal ganglia) |
| lead | rs2912062 | 8   | 6485295  | C  | <i>MCPH1-AS1</i> | ENSG00000271743.1 | 1.20E-06 | -0.65 | Cells - EBV-transformed lymphocytes       |
| lead | rs2912062 | 8   | 6485295  | C  | <i>MCPH1-AS1</i> | ENSG00000271743.1 | 5.40E-11 | -0.55 | Colon - Transverse                        |
| lead | rs2912062 | 8   | 6485295  | C  | <i>MCPH1-AS1</i> | ENSG00000271743.1 | 1.60E-06 | -0.35 | Esophagus - Muscularis                    |
| lead | rs2912062 | 8   | 6485295  | C  | <i>MCPH1-AS1</i> | ENSG00000271743.1 | 8.70E-11 | -0.43 | Nerve - Tibial                            |
| lead | rs2912062 | 8   | 6485295  | C  | <i>MCPH1-AS1</i> | ENSG00000271743.1 | 2.70E-06 | -0.58 | Ovary                                     |
| lead | rs2912062 | 8   | 6485295  | C  | <i>MCPH1-AS1</i> | ENSG00000271743.1 | 2.10E-06 | -0.48 | Stomach                                   |
| lead | rs2912062 | 8   | 6485295  | C  | <i>MCPH1-AS1</i> | ENSG00000271743.1 | 4.80E-08 | -0.55 | Testis                                    |
| lead | rs2912062 | 8   | 6485295  | C  | <i>MCPH1-AS1</i> | ENSG00000271743.1 | 2.40E-07 | -0.34 | Thyroid                                   |
| lead | rs2912063 | 8   | 6486033  | A  | <i>MCPH1-AS1</i> | ENSG00000271743.1 | 4.60E-06 | -0.51 | Brain - Cortex                            |
| lead | rs2912063 | 8   | 6486033  | A  | <i>MCPH1-AS1</i> | ENSG00000271743.1 | 2.00E-06 | -0.44 | Brain - Nucleus accumbens (basal ganglia) |
| lead | rs2912063 | 8   | 6486033  | A  | <i>MCPH1-AS1</i> | ENSG00000271743.1 | 8.40E-11 | -0.55 | Colon - Transverse                        |
| lead | rs2912063 | 8   | 6486033  | A  | <i>MCPH1-AS1</i> | ENSG00000271743.1 | 3.80E-07 | -0.37 | Esophagus - Muscularis                    |



|      |            |    |           |   |                      |                    |          |       |                                     |
|------|------------|----|-----------|---|----------------------|--------------------|----------|-------|-------------------------------------|
| lead | rs2912063  | 8  | 6486033   | A | <i>MCPH1-AS1</i>     | ENSG00000271743.1  | 6.20E-10 | -0.41 | Nerve - Tibial                      |
| lead | rs2912063  | 8  | 6486033   | A | <i>MCPH1-AS1</i>     | ENSG00000271743.1  | 2.90E-06 | -0.59 | Ovary                               |
| lead | rs2912063  | 8  | 6486033   | A | <i>MCPH1-AS1</i>     | ENSG00000271743.1  | 1.20E-06 | -0.5  | Stomach                             |
| lead | rs2912063  | 8  | 6486033   | A | <i>MCPH1-AS1</i>     | ENSG00000271743.1  | 1.10E-07 | -0.54 | Testis                              |
| lead | rs2912063  | 8  | 6486033   | A | <i>MCPH1-AS1</i>     | ENSG00000271743.1  | 3.30E-07 | -0.34 | Thyroid                             |
| Lead | rs2150562  | 10 | 29873494  | A | <i>SVIL</i>          | ENSG00000197321.14 | 3.30E-13 | -0.16 | Artery - Tibial                     |
| Lead | rs2150562  | 10 | 29873494  | A | <i>SVIL</i>          | ENSG00000197321.14 | 9.4E-06  | -0.13 | Artery - Aorta                      |
| Lead | rs2150562  | 10 | 29873494  | A | <i>SVIL</i>          | ENSG00000197321.14 | 0.00011  | -0.13 | Thyroid                             |
| lead | rs2019090  | 11 | 103668962 | A | <i>RP11-563P16.1</i> | ENSG00000254987.1  | 3.70E-05 | -0.3  | Artery - Aorta                      |
| lead | rs561732   | 16 | 88988989  | T | <i>CBFA2T3</i>       | ENSG00000129993.10 | 7.10E-15 | -0.47 | Pancreas                            |
| lead | rs561732   | 16 | 88988989  | T | <i>CBFA2T3</i>       | ENSG00000129993.10 | 1.90E-05 | -0.17 | Thyroid                             |
| VEP  | rs28375406 | 16 | 88996841  | A | <i>CBFA2T3</i>       | ENSG00000129993.10 | 2.90E-10 | -0.39 | Pancreas                            |
| VEP  | rs28375406 | 16 | 88996841  | A | <i>CBFA2T3</i>       | ENSG00000129993.10 | 1.50E-05 | -0.17 | Thyroid                             |
| VEP  | rs7412     | 19 | 45412079  | C | <i>APOE</i>          | ENSG00000130203.5  | 2.20E-05 | -0.29 | Skin - Not Sun Exposed (Suprapubic) |

Where: *CTD-2541M15.3* also known as *MCPH1-AS1*

Supplemental Table IX: Baseline demographic characteristics of the individuals included in the analysis of ISH

|                                | ISH         | Controls      |
|--------------------------------|-------------|---------------|
| N (%)                          | 7944 (71.8) | 367952 (45.1) |
| Age (years)                    | 62.2 (5.9)  | 56.8 (8.0)    |
| Weight (Kg)                    | 82.5 (15.2) | 78.2 (15.9)   |
| Waist (cm)                     | 96.0 (12.5) | 90.3 (13.5)   |
| Hip (cm)                       | 104.0 (8.6) | 103.5 (9.2)   |
| WHR                            | 0.92 (0.08) | 0.87 (0.09)   |
| BMI (kg/m <sup>2</sup> )       | 28.4 (4.5)  | 27.4 (4.8)    |
| SBP (mmHg)                     | 134 (17)    | 139 (19)      |
| DBP (mmHg)                     | 77 (10)     | 82 (10)       |
| Corrected SBP (mmHg)*          | 141 (18)    | 142 (21)      |
| Corrected DBP (mmHg)*          | 82 (10)     | 84 (11)       |
| N hypertension                 | 2680 (36.2) | 190044 (54.2) |
| N on BP medication             | 3398 (43.4) | 74176 (20.3)  |
| N on lipid lowering medication | 4854 (89.1) | 33456 (22.8)  |
| N probable t2d                 | 784 (9.9)   | 15422 (4.2)   |
| N current smoking              | 1033 (13.1) | 37428 (10.2)  |

Where: \* adjusted for blood pressure medication as per Ehret et al, T2D, type 2 diabetes; ISH, ischemic heart disease

Supplemental Table X: Baseline demographic characteristics of the individuals included in the analysis of stroke

|                                | Stroke      | Controls      |
|--------------------------------|-------------|---------------|
| N (% men)                      | 6060 (59.8) | 367945 (45.1) |
| Age (years)                    | 61.3 (6.5)  | 56.8 (8.0)    |
| Weight (Kg)                    | 82.5 (16.6) | 78.2 (15.9)   |
| Waist (cm)                     | 96.5 (13.9) | 90.3 (13.5)   |
| Hip (cm)                       | 105.3 (9.9) | 103.5 (9.2)   |
| WHR                            | 0.92 (0.09) | 0.87 (0.09)   |
| BMI (kg/m <sup>2</sup> )       | 29.0 (5.1)  | 27.4 (4.8)    |
| SBP (mmHg)                     | 140 (19)    | 139 (19)      |
| DBP (mmHg)                     | 82 (10)     | 82 (10)       |
| Corrected SBP (mmHg)*          | 149 (21)    | 142 (21)      |
| Corrected DBP (mmHg)*          | 88 (12)     | 84 (11)       |
| N hypertension                 | 4259 (72.6) | 190038 (54.2) |
| N on BP medication             | 3726 (62.2) | 74203 (20.3)  |
| N on lipid lowering medication | 2739 (86.4) | 33470 (22.8)  |
| N probable t2d                 | 810 (13.4)  | 15446 (4.2)   |
| n current smoking              | 963 (16.0)  | 37445 (10.2)  |

Where: \* adjusted for blood pressure medication as per Ehret et al, T2D, type 2 diabetes; ISH, ischemic heart disease

Supplemental Table XI: Effect of IMT SNPs on ISH or stroke in UKB

| Analysis                   | SNP         | cIMT |    |        |    |        | Stroke |      |       |        |        | ISH  |      |       |                 |
|----------------------------|-------------|------|----|--------|----|--------|--------|------|-------|--------|--------|------|------|-------|-----------------|
|                            |             | CHR  | A1 | beta   | A1 | N      | OR     | L95  | U95   | P      | N      | OR   | L95  | U95   | P               |
| IMTmean sex<br>combined    | rs758080886 | 5    | CA | 0.013  | CA | 299237 | 0.92   | 0.87 | 0.99  | 0.0170 | 300879 | 0.93 | 0.88 | 0.98  | 0.0091          |
|                            | rs342988    | 7    | C  | 0.011  | C  | 368953 | 1.04   | 1.00 | 1.08  | 0.0776 | 370860 | 1.01 | 0.97 | 1.04  | 0.7248          |
|                            | rs2912062   | 8    | C  | 0.012  | G  | 361917 | 0.96   | 0.92 | 1.00  | 0.0618 | 363800 | 0.97 | 0.94 | 1.01  | 0.1172          |
|                            | rs34557926  | 8    | C  | -0.011 | T  | 364824 | 1.00   | 0.96 | 1.04  | 0.8961 | 366699 | 1.00 | 0.96 | 1.03  | 0.7896          |
|                            | rs2019090   | 11   | A  | 0.009  | A  | 369140 | 1.02   | 0.97 | 1.06  | 0.4789 | 371023 | 1.09 | 1.05 | 1.13  | <b>2.73E-06</b> |
|                            | rs561732    | 16   | T  | 0.009  | C  | 363617 | 1.01   | 0.97 | 1.05  | 0.7940 | 365499 | 0.97 | 0.93 | 1.00  | 0.0560          |
|                            | rs111689747 | 19   | G  | -0.044 | A  | 368879 | 0.96   | 0.80 | 1.16  | 0.6831 | 370787 | 1.00 | 0.85 | 1.17  | 0.9954          |
|                            | rs1065853   | 19   | G  | 0.021  | T  | 370443 | 0.91   | 0.85 | 0.97  | 0.0064 | 372354 | 0.83 | 0.78 | 0.88  | <b>3.07E-09</b> |
| IMTmax sex<br>combined     | rs11762074  | 7    | T  | -0.014 | C  | 369523 | 1.01   | 0.96 | 1.05  | 0.8068 | 371440 | 1.01 | 0.97 | 1.04  | 0.7928          |
|                            | rs11025608  | 11   | G  | -0.010 | G  | 362725 | 1.01   | 0.98 | 1.05  | 0.4502 | 364596 | 1.01 | 0.98 | 1.04  | 0.6616          |
| IMTmeanmax sex<br>combined | rs2150562   | 10   | A  | 0.008  | A  | 370859 | 1.03   | 0.99 | 1.066 | 0.2207 | 372774 | 1.00 | 0.96 | 1.033 | 0.9018          |
| IMTmean Men                | rs35099106  | 7    | C  | 0.016  | C  | 367661 | 1.01   | 0.96 | 1.05  | 0.8134 | 369559 | 1.00 | 0.96 | 1.04  | 0.9698          |
|                            | rs2912063   | 8    | A  | 0.017  | G  | 361633 | 0.96   | 0.92 | 1.00  | 0.0595 | 363507 | 0.98 | 0.94 | 1.01  | 0.1665          |
| IMTmean<br>Women           | rs309563    | 5    | A  | -0.012 | T  | 363632 | 1.00   | 0.96 | 1.04  | 0.9140 | 365516 | 1.02 | 0.98 | 1.05  | 0.3707          |

Supplemental Table XII: Quality control data for lead SNPs.

| Analysis                   | SNP          | CHR | locus*                  | A1 | A0 | A1<br>freq | GWAS<br>SNPs<br>in<br>locus | Missing  | N A1 het | N<br>homo | N A0<br>het | Observed<br>het | Expected<br>het | HWE P  |
|----------------------------|--------------|-----|-------------------------|----|----|------------|-----------------------------|----------|----------|-----------|-------------|-----------------|-----------------|--------|
| IMTmean sex<br>combined    | rs758080886  | 5   |                         | CA | C  | 0.15       | 1                           | 0.189    | 231      | 3851      | 13879       | 0.214           | 0.211           | 0.0520 |
|                            | rs342988†    | 7   | 35423859-<br>35528567   | C  | T  | 0.28       | 78                          | 0.004    | 1719     | 8855      | 11470       | 0.402           | 0.402           | 0.8670 |
|                            | rs2912062‡   | 8   | 6470650-<br>6494850     | C  | G  | 0.71       | 56                          | 0.023    | 10803    | 8993      | 1843        | 0.416           | 0.414           | 0.6459 |
|                            | rs34557926   | 8   | 124579985-<br>124608614 | C  | T  | 0.64       | 4                           | 0.016    | 8969     | 10028     | 2788        | 0.460           | 0.460           | 0.8596 |
|                            | rs2019090    | 11  | 103660567-<br>103673294 | A  | T  | 0.29       | 5                           | 0.003    | 1852     | 9036      | 11180       | 0.410           | 0.411           | 0.6700 |
|                            | rs561732     | 16  | 88966667-<br>88989862   | T  | C  | 0.65       | 22                          | 0.018    | 9216     | 9797      | 2728        | 0.451           | 0.456           | 0.1179 |
|                            | rs111689747  | 19  | 41188985-<br>41371458   | G  | A  | 0.99       | 3                           | 0.006    | 21527    | 489       | 3           | 0.022           | 0.022           | 0.7587 |
|                            | rs1065853§   | 19  | 45412079-<br>45426792   | G  | T  | 0.92       | 7                           | 0.001    | 18790    | 3201      | 130         | 0.145           | 0.144           | 0.6413 |
| IMTmax sex<br>combined     | rs11762074 † | 7   | 35428513-<br>35505204   | T  | C  | 0.77       | 63                          | 0.004    | 12974    | 7883      | 1207        | 0.357           | 0.358           | 0.8360 |
|                            | rs11025608   | 11  |                         | G  | T  | 0.44       | 1                           | 0.022    | 4156     | 10839     | 6659        | 0.501           | 0.493           | 0.0316 |
|                            | rs1065853§   | 19  | 45389596-<br>45426792   | G  | T  | 0.92       | 11                          | as above |          |           |             |                 |                 |        |
| IMTmeanmax<br>sex combined | rs2150562    | 10  | 30161168-<br>30168699   | A  | G  | 0.311      | 4                           | 0        | 2155     | 9481      | 10507       | 0.428           | 0.429           | 0.8142 |
| IMTmean<br>Men             | rs35099106 † | 7   | 35428513-<br>35505204   | C  | CT | 0.24       | 38                          | 0.008    | 1203     | 7843      | 12914       | 0.357           | 0.358           | 0.7917 |

|                  |            |    |                   |   |   |       |    |          |       |      |      |       |       |        |
|------------------|------------|----|-------------------|---|---|-------|----|----------|-------|------|------|-------|-------|--------|
|                  | rs2912063‡ | 8  | 6470650-6490544   | A | G | 0.71  | 24 |          |       |      |      |       |       |        |
|                  |            |    |                   |   |   |       |    | 0.023    | 10919 | 8915 | 1799 | 0.412 | 0.411 | 0.7408 |
|                  | rs1065853§ | 19 | 45412079-45413233 | G | T | 0.92  | 2  |          |       |      |      |       |       |        |
|                  |            |    |                   |   |   |       |    | as above |       |      |      |       |       |        |
| IMTmean<br>Women | rs309563   | 5  | 82870033-82933913 | A | T | 0.659 | 37 |          |       |      |      |       |       |        |
|                  |            |    |                   |   |   |       |    | 0.019    | 9549  | 9723 | 2453 | 0.448 | 0.447 | 0.7729 |

Where: \*, region bordered by gwas-significant SNPs; het, heterozygotes; homo, homozygotes; HWE P, Pvalue for test of deviation from Hardy-Weinberg equilibrium; †, LD between rs342988, rs11762074 and rs35099106 suggests that these SNPs represent 1 signal; ‡, LD between rs2912062 and rs2912063 indicate that these SNPs are proxies; §, consistent lead SNP convincingly demonstrates that the same locus is being identified; ||, novel locus.
